# Supplementary material for: Enhanced Characterization of Lysine-Linked Antibody Drug Conjugates Enabled by Middle-Down Mass Spectrometry and Higher-Energy Collisional Dissociation-Triggered Electron-Transfer/Higher-Energy Collisional Dissociation and Ultraviolet Photodissociation
Source: MDPI journal article supplement (doi:10.3390/antib13020030), 2024-04-17
Supplement: s1 [file s1]

## Supporting Information

### Enhanced Characterization of Lysine-Linked Antibody Drug Conjugates Enabled by Middle-Down Mass Spectrometry and HCD-Triggered EThcD and UVPD

Eleanor Watts<sup>1</sup>, Aarti Bashyal,<sup>1</sup> Sean D. Dunham,<sup>1</sup> Christopher M. Crittenden<sup>2</sup>, Jennifer S. Brodbelt<sup>1</sup>

<sup>1</sup>Department of Chemistry, University of Texas at Austin, Austin, TX 78712

<sup>2</sup> Small Molecule Pharmaceutical Sciences, Genentech Inc., South San Francisco, CA 94080

Correspondence to: [jbrodbelt@cm.utexas.edu](mailto:jbrodbelt@cm.utexas.edu)

| Content    | Content                                                                                                                           | Page No |
|------------|-----------------------------------------------------------------------------------------------------------------------------------|---------|
| Scheme S1  | Structures of DM1 related fragments                                                                                               | S-3     |
| Figure S1  | HCD sequence coverage maps at low and high resolutions                                                                            | S-4     |
| Figure S2  | Expanded m/z regions to demonstrate quality of top-down data                                                                      | S-5     |
| Figure S3  | Extracted ion chromatogram and sequence coverage maps of LC peptides containing 126 residues (D1 through K126) and one payload    | S-6     |
| Figure S4  | Extracted ion chromatogram and sequence coverage maps of HC peptides containing 99 residues (G344 through K442) and one payload   | S-7     |
| Figure S5  | Extracted ion chromatogram and sequence coverage maps of HC peptides containing 93 residues (G44 through K136) and one payload    | S-8     |
| Figure S6  | Extracted ion chromatograms and sequence coverage maps of LC peptides containing 24 residues (A184 through K207) and 0-2 payloads | S-9     |
| Figure S7  | Extracted ion chromatograms and sequence coverage maps of HC peptides containing 65 residues (E1 through K65) and 0-2 payloads    | S-10    |
| Figure S8  | Extracted ion chromatograms and sequence coverage maps of HC peptides containing 66 residues (T226 through K291) and 0-2 payloads | S-11    |
| Figure S9  | Peptide map displaying the global sequence coverage of heavy chain                                                                | S-12    |
| Figure S10 | Peptide map displaying the global sequence coverage of light chain                                                                | S-13    |
| Figure S11 | Sequence maps displaying payload conjugation locations for secondary sample                                                       | S-14    |
| Figure S12 | Base peak chromatograms of tryptic digests of T-DM1 from two batches.                                                             | S-15    |
| Figure S13 | Sequence coverage maps of the heavy chain and light chain of TDM-1 based on LC-MS/MS (UVPD) analysis of a tryptic digest.         | S-16    |

|            |                                                                                                                                                                    |       |
|------------|--------------------------------------------------------------------------------------------------------------------------------------------------------------------|-------|
| Figure S14 | Sequence coverage maps of the heavy chain and light chain of TDM-1 based on LC-MS/MS (EThcD) analysis of a tryptic digest.                                         | S-17  |
| Figure S15 | Sequence maps of the (A) heavy chain and (B) light chain of T-DM1 displaying the locations of the payloads identified using bottom-up analysis.                    | S-18  |
| Figure S16 | Mass spectrum of intact TDM-1 (lower) and deconvoluted mass spectrum (upper).                                                                                      | S-19  |
| Figure S17 | Peptide maps of the A) heavy chain and B) light chain of TDM-1 based on all identified peptides from the tryptic digest.                                           | S-20  |
| Table S1   | List of single payload-containing peptides identified from UVPD data for primary sample                                                                            | S-21  |
| Table S2   | List of single payload-containing peptides identified from EThcD data for primary sample                                                                           | S-23  |
| Table S3   | Mass errors of identified fragment ions of the peptides listed in Tables S1 and S2                                                                                 | Excel |
| Table S4   | List of two payload-containing peptides identified from UVPD data for primary sample                                                                               | S-25  |
| Table S5   | List of two payload-containing peptides identified from EThcD data for primary sample                                                                              | S-26  |
| Table S6   | List of single payload-containing peptides identified from UVPD data for secondary sample                                                                          | S-27  |
| Table S7   | List of single payload-containing peptides identified from EThcD data for secondary sample                                                                         | S-29  |
| Table S8   | List of two payload-containing peptides identified from UVPD data for secondary sample                                                                             | S-31  |
| Table S9   | List of two payload-containing peptides identified from EThcD data for secondary sample                                                                            | S-32  |
| Table S10  | Number of identified payload-modified peptide spectral matches for two different lots of TDM-1 based on bottom-up analysis of tryptic digests.                     | S-33  |
| Table S11  | Number of payload-modified lysines identified in heavy and light chains (HC and LC) of two different lots of TDM-1 based on bottom-up analysis of tryptic digests. | S-34  |

## Trastuzumab

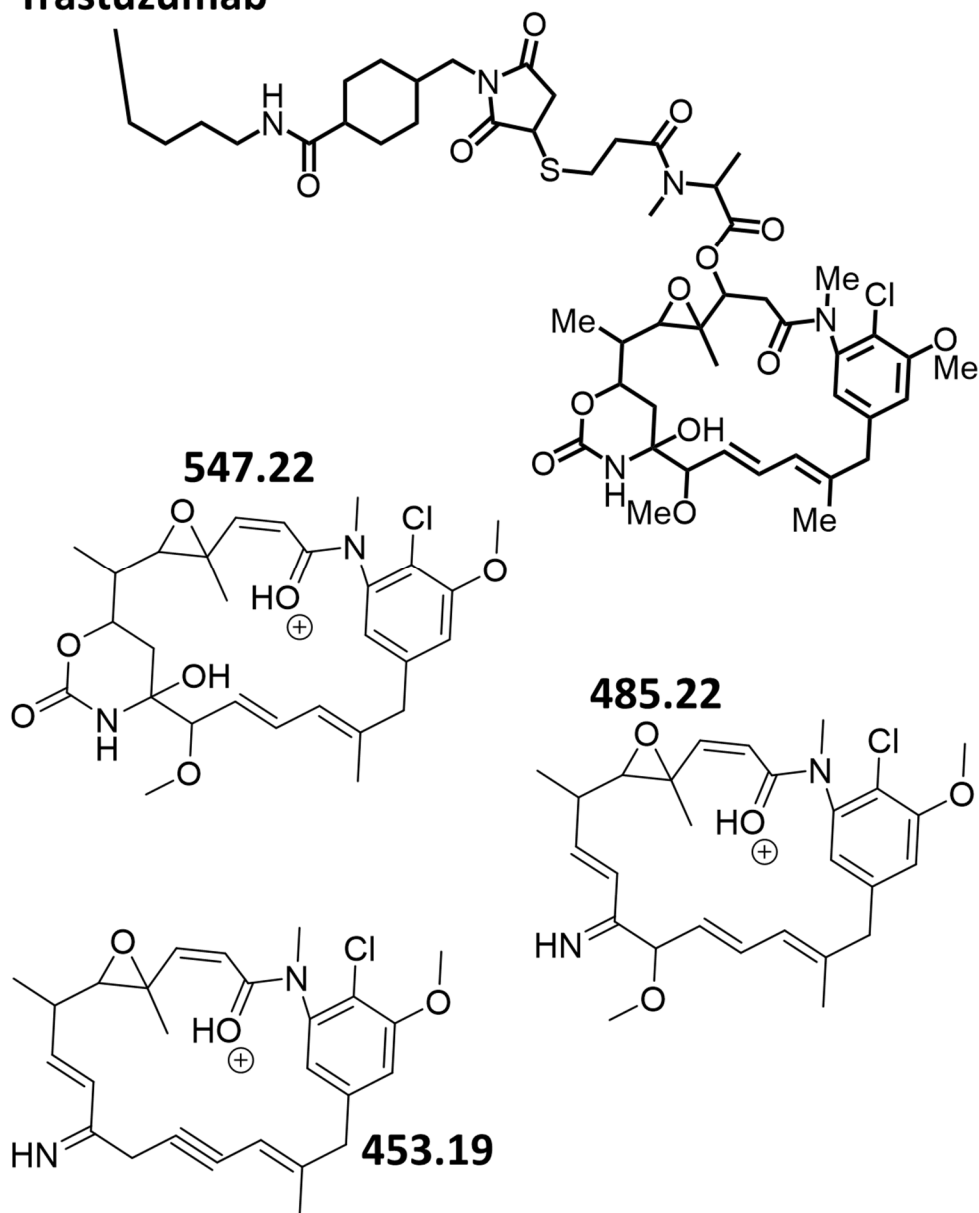

**Scheme S1.** Structure of DM1 payload conjugated to trastuzumab and possible fragment ion structures that correspond to payload reporter ions of  $m/z$  547.22, 485.22, and 453.19 Da observed in the HCD mass spectra.

**30k Resolution: 34% sequence coverage (HC-K395 and HC-K417)**

N G F Y P S D I A V E W E S N G Q P E N N Y K T T P 25  
26 P V L D S D G S F F L Y S K L T V D K S R W Q Q G 50  
51 N V F S C S V M H E A L L H N H Y T Q K C

**240k Resolution: 37% sequence coverage (HC-K395 and HC-K417)**

N G F Y P S D I A V E W E S N G Q P E N N Y K T T P 25  
26 P V L D S D G S F F L Y S K L T V D K S R W Q Q G 50  
51 N V F S C S V M H E A L L H N H Y T Q K C

**Figure S1.** Sequence coverage maps of an 9.8 kDa peptide (6+) for HCD with (A) 30,000 and (B) 240,000 resolution at  $m/z$  200. K22 and K44 of the peptide sequence shown here corresponds to K395 and K417 of the antibody heavy chain. The modified lysine sites are shaded in gold.

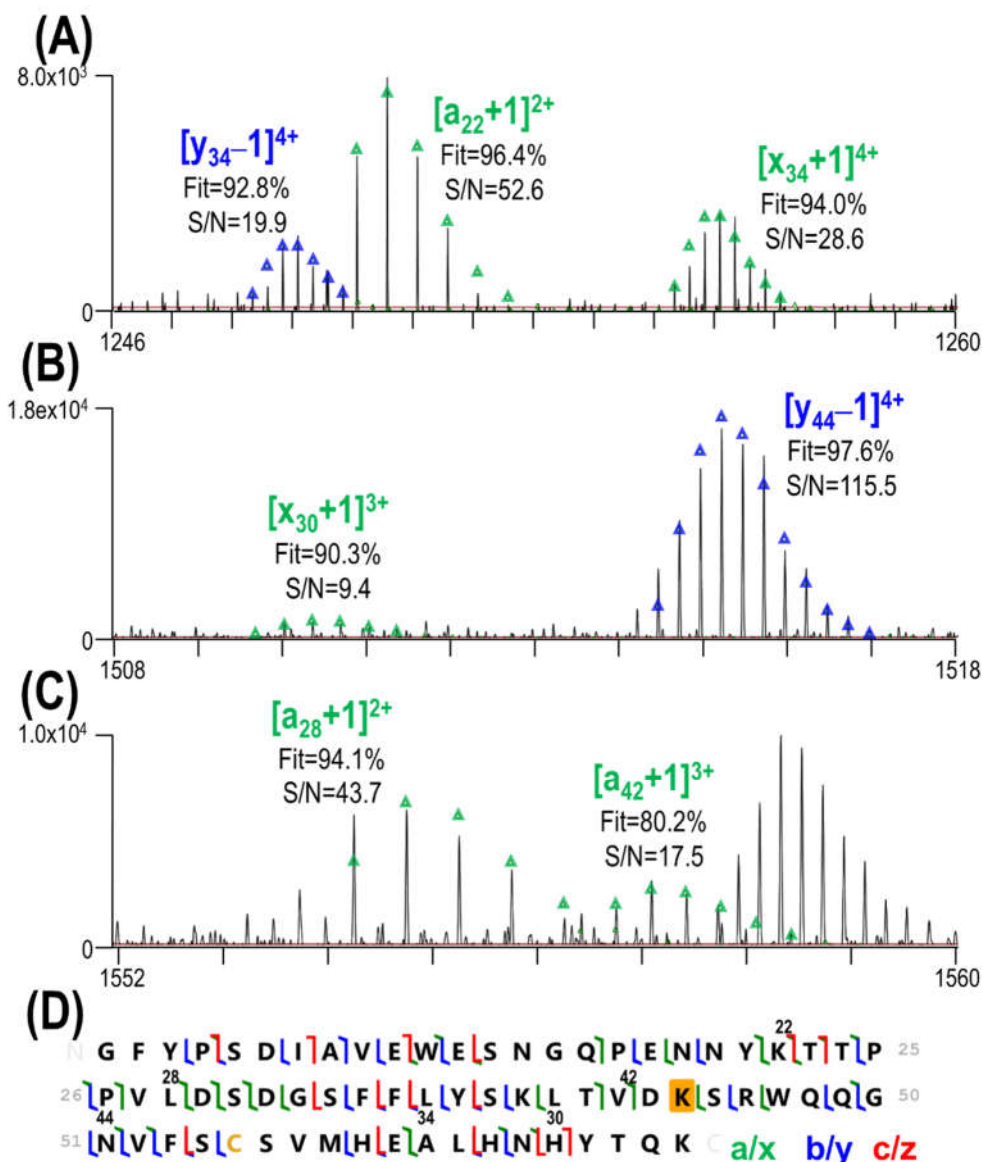

**Figure S2.** Expanded regions of the UVPD mass spectrum shown in **Figure 3C** illustrating examples of fragment ion isotope patterns with (A) high fit factors and signal to noise, (B) low signal to noise, and (C) low fit factors. (D) Sequence map highlighting the backbone cleavage sites from which the identified fragment ions originated. In this and other sequence maps, backbone cleavages that lead to a/x (green), b/y (blue) and c/z (green) ions are overlaid, partially obscuring the color coded cleavage sites. The modified lysine sites are shaded in gold.

A variety of fragment ions were identified with and without the payload, including C-terminal payload containing fragments (A)  $[y_{34}-1]^{4+}$ , (A)  $[x_{34}+1]^{4+}$ , (B)  $[x_{30}+1]^{3+}$ , and (B)  $[y_{44}-1]^{4+}$ , and N-terminal fragments without the payload (A)  $[a_{22}+1]^{2+}$ , (C)  $[a_{28}+1]^{2+}$ , and (C)  $[a_{42}+1]^{3+}$ . Fit factors are calculated in Thermo Xtract and signal to noise values and the theoretical isotopic distributions are generated with TDValidator.

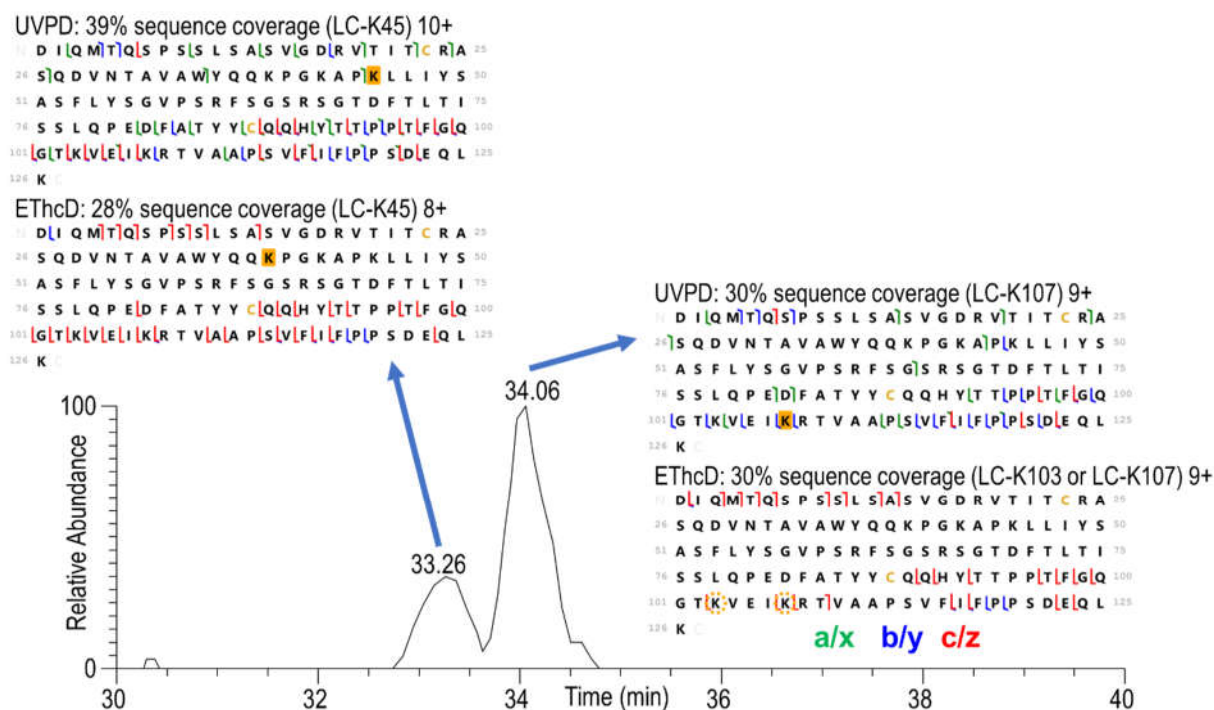

**Figure S3.** Extracted ion chromatogram revealing two light chain peptides (14.7 kDa, 8+), each containing 126 residues (D1 through K126) and a single payload. Sequence coverage maps obtained by EThcD and UVPD localize the payload to K45 (peptide at 33.26 min) or K107 (peptide at 34.06 min). The payload localization sites are shaded in gold when unambiguous and circled when ambiguous.

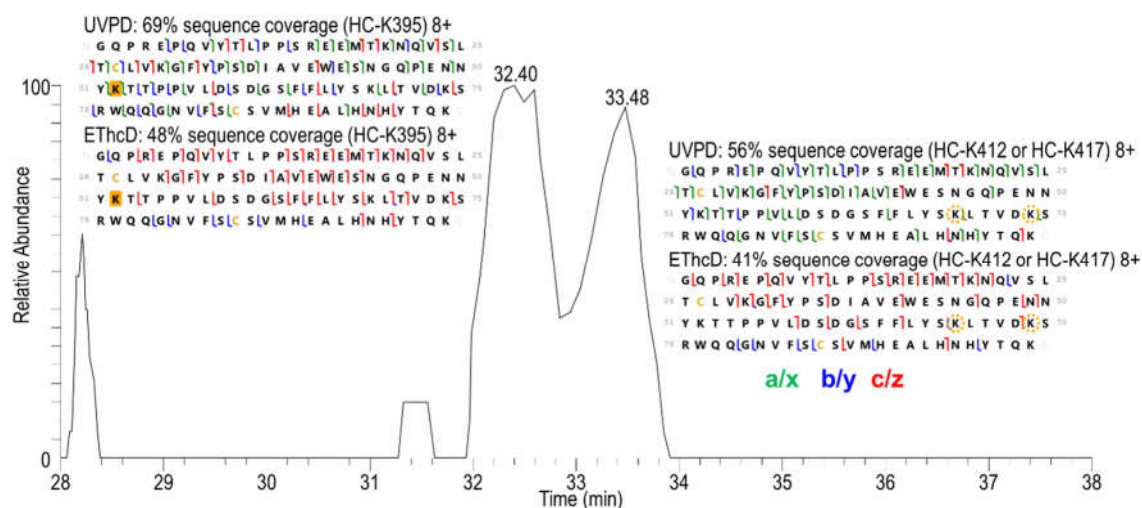

**Figure S4.** Extracted ion chromatogram revealing two heavy chain peptides (12.3 kDa, 8+), each containing 99 residues (G344 through K442) and a single payload. Sequence coverage maps



obtained by EThcD and UVPD localize the payload to HC-K395 (peptide at 32.40 min) or HC-K412/K417 (peptide at 33.48 min). K52, K69, and K74 of the sequence correspond to K395, K412, and K417 of the heavy chain. The payload localization sites are shaded in gold when unambiguous and circled when ambiguous.

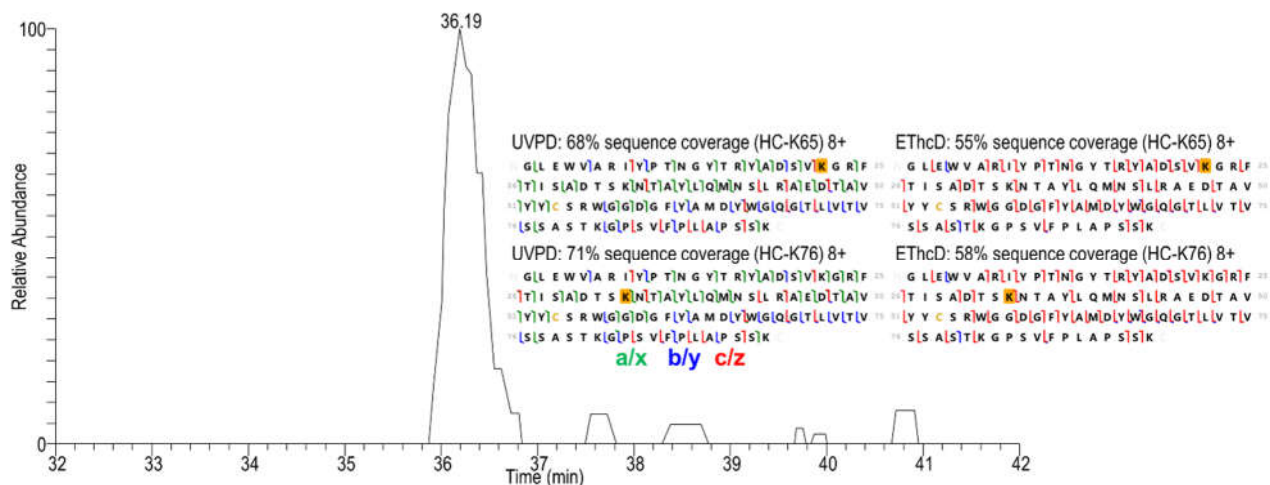

**Figure S5.** Extracted ion chromatogram of a heavy chain peptide (11.2 kDa, 8+) containing G44 through K136 and a single payload. Sequence coverage maps are included for EThcD and UVPD which localize the payload to both K65 and K76, although they are not chromatically resolved and are therefore co-isolated. K22 and K33 of the sequence correspond to K65 and K76 of the heavy chain. The payload sites are shaded in gold when unambiguously localized.

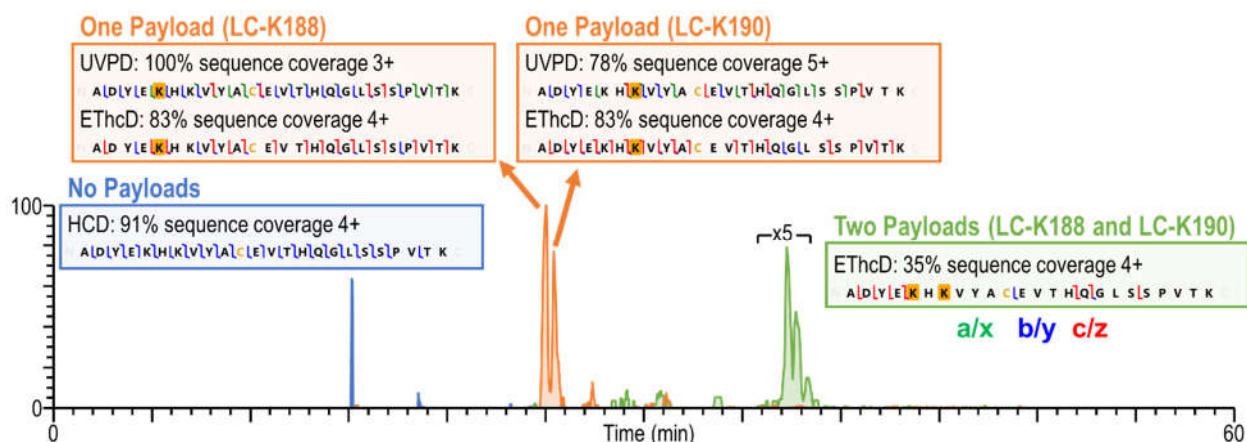

**Figure S6.** EICs for the 4+ charge state of a 24 amino acid long light chain peptide containing A184 through K207 with zero ( $m/z$  673.33), one ( $m/z$  913.18) or two ( $m/z$  1152.27) payload conjugations. Sequence coverage maps are included for each chromatographic peak observed in





ambiguous. K24, K26, and K52 on these maps correspond to K249, K251, and K277 on the heavy chain. Owing to co-elution, two maps are included for peptide corresponding to the light chain containing one payload (t: 35 min).

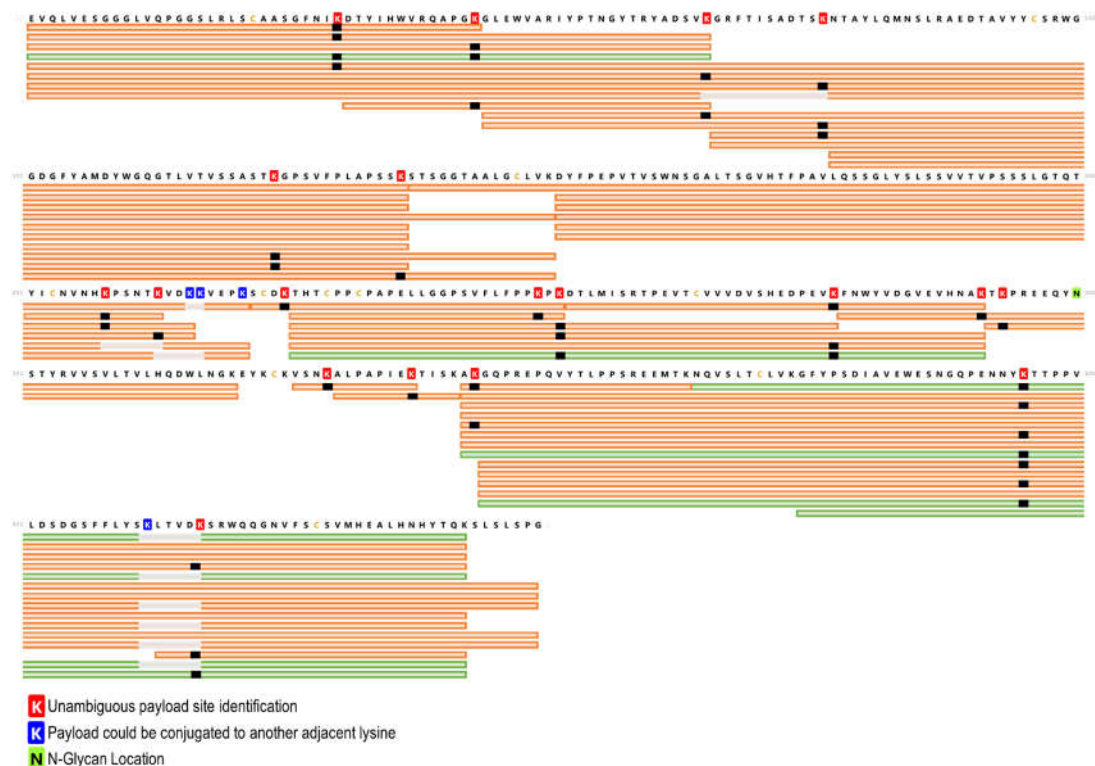

**Figure S9.** Peptide map displaying the global sequence coverage for the heavy chain. The same legend used in Figure 5 was retained for the heavy chain sequence. Peptides displayed in orange contain a single payload conjugation and peptides displayed in green contain two payload conjugations. Unambiguously localized payload conjugations sites are shown in black on for each peptide, and payloads that could be localized two multiple sites are shown in gray.

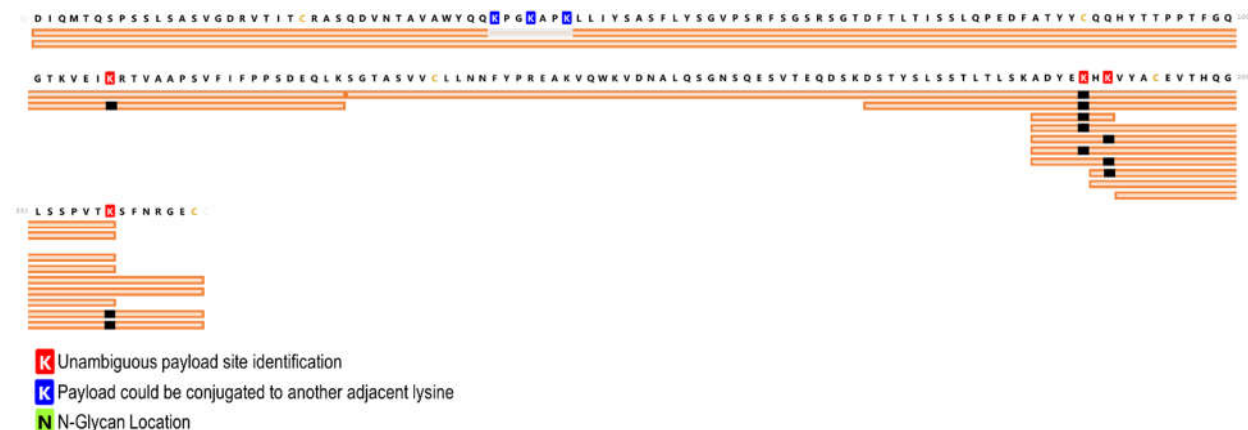

**Figure S10.** Peptide map displaying the global sequence coverage for the light chain. The same legend used in Figure 5 was retained for the heavy chain sequence. Peptides displayed in

orange contain a single payload conjugation. Unambiguously localized payload conjugations sites are shown in black on for each peptide, and payloads that could be localized two multiple sites are shown in gray.

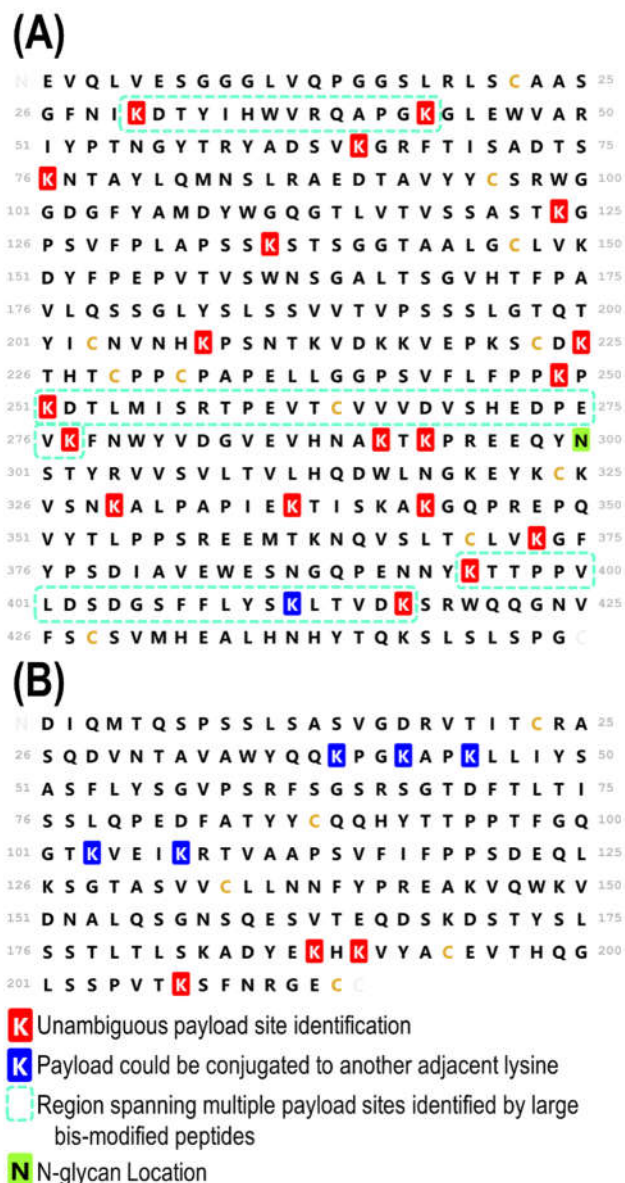

**Figure S11.** Sequence maps of the (A) heavy chain and (B) light chain of T-DM1 displaying the locations of the payloads, including those that were unambiguously localized (shared is red) and those that remain ambiguous with adjacent or nearby lysine residues (shaded in blue). Visualization displays results for secondary T-DM1 sample. Regions containing multiple payload sites that are identified by large bis-conjugated peptides are outlined in dashed boxes.

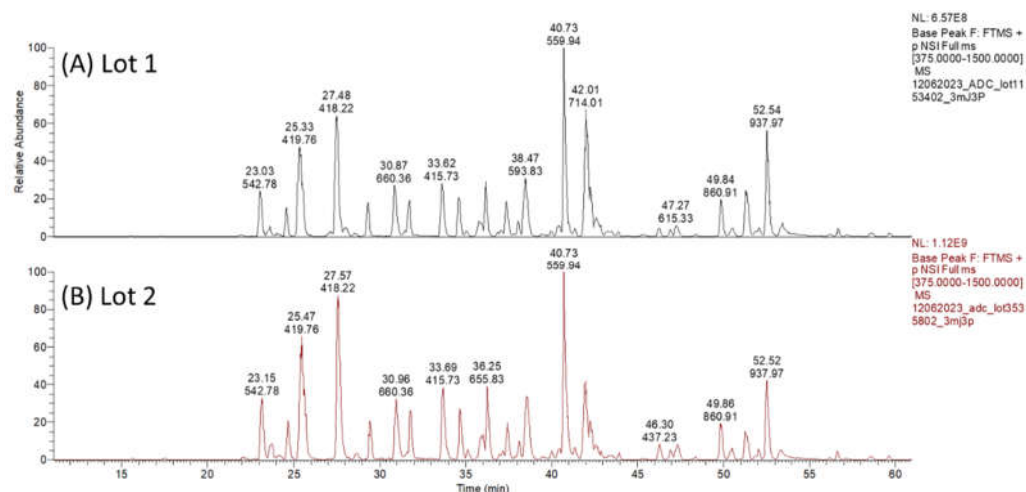

**Figure S12.** Base peak chromatograms of T-DM1 from two batches ((A) is Lot 1 and (B) is Lot 2) subjected to reduction, alkylation, and trypsin digestion separated using a 62 min gradient. Peaks are labeled with base peak  $m/z$  and retention times and represent unmodified peptides. Payload-containing peptides are at least 2 orders of magnitude lower and are not labeled.

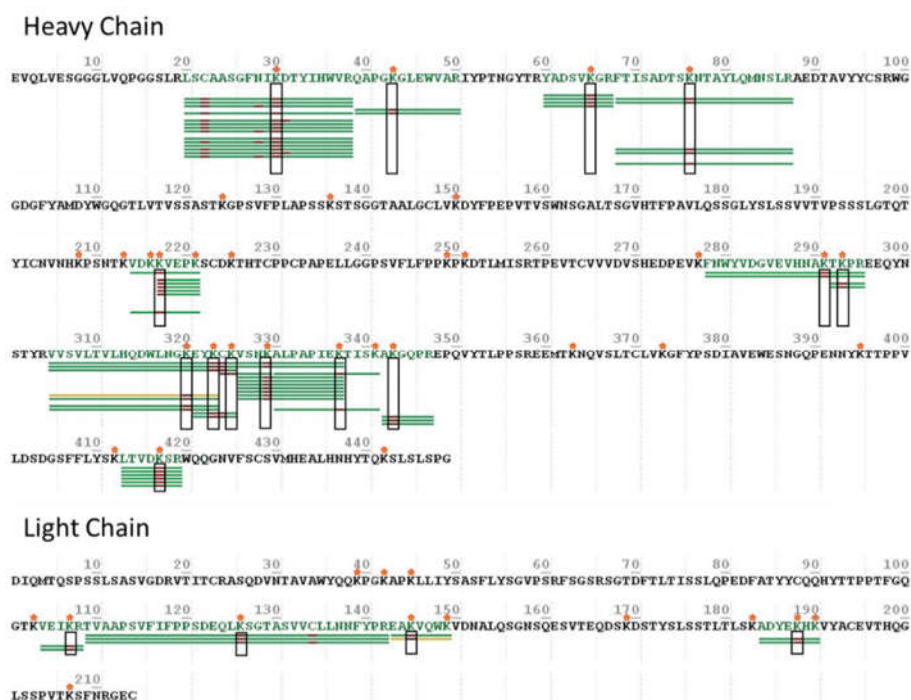

**Figure S13:** Sequence coverage maps of the heavy chain and light chain of TDM-1 based on LC-MS/MS (UVPD) analysis of a tryptic digest. Only payload-containing peptides

are shown in the maps, and these peptides are indicated by horizontal green bars. All lysines are labelled with red stars. All payload-modified lysines are outlined with black boxes. Fourteen payload-modified lysines were identified for the heavy chain, and four payload-modified peptides were identified for the light chain.

### Heavy Chain

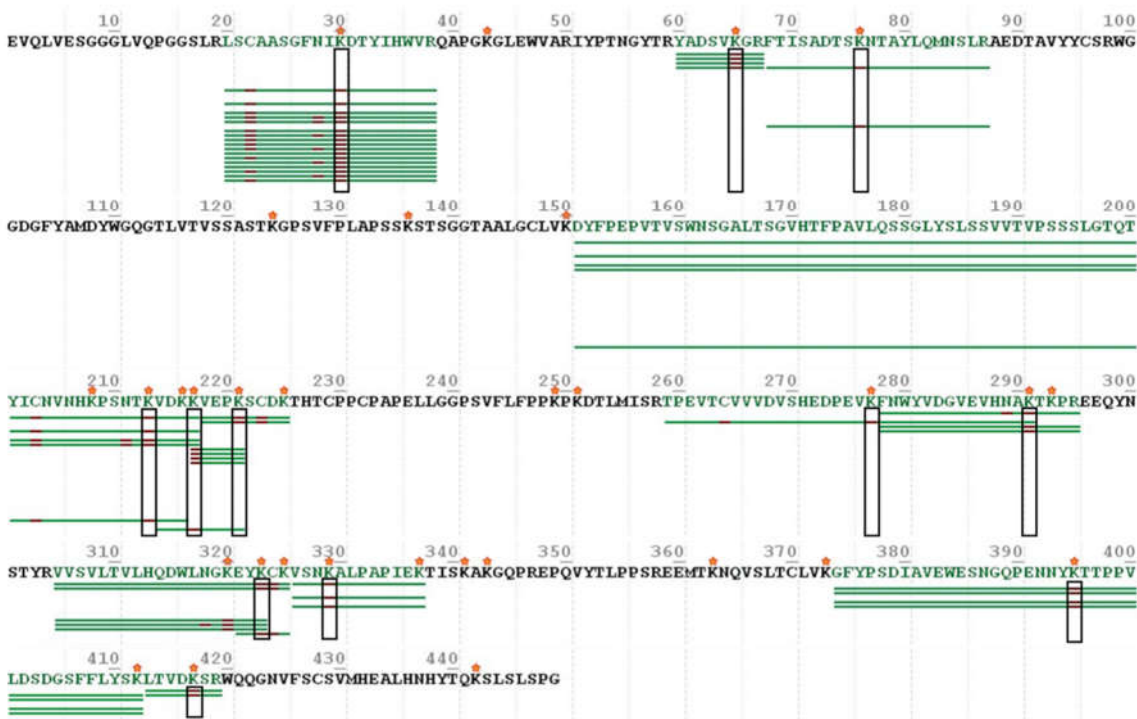

### Light Chain

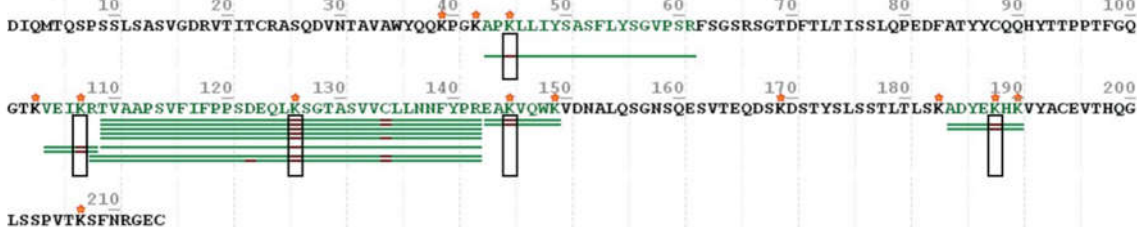

**Figure S14.** Sequence coverage maps of the heavy chain and light chain of TDM-1 based on LC-MS/MS (ET<sub>h</sub>cD) analysis of a tryptic digest. Only payload-containing peptides are shown in the maps, and these peptides are indicated by horizontal green bars. All lysines are labelled with red stars. All payload-modified lysines are outlined with black boxes. Twelve payload-modified lysines were identified for the heavy chain, and five payload-modified peptides were identified for the light chain.

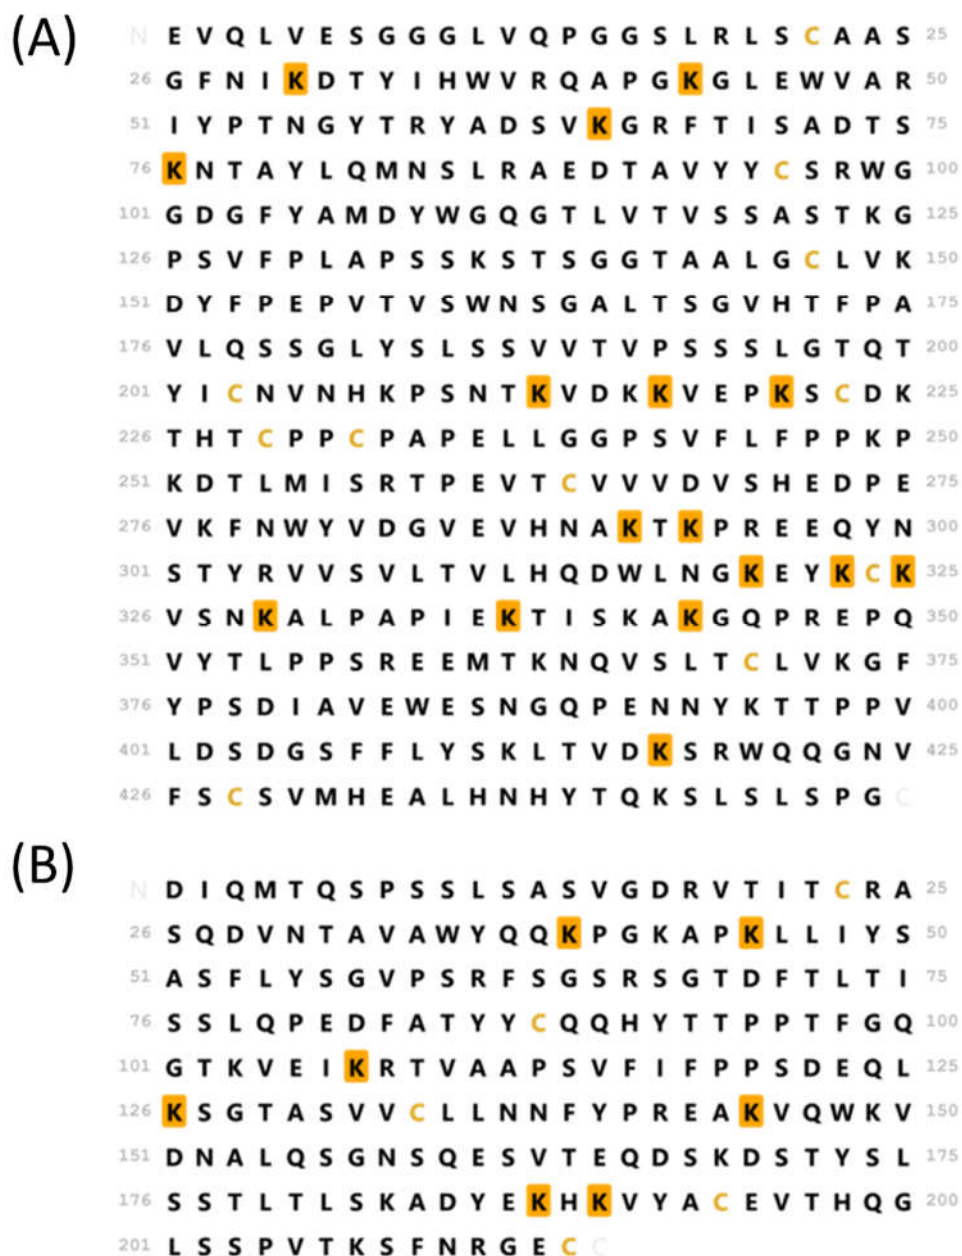

**Figure S15.** Sequence maps of the (A) heavy chain and (B) light chain of T-DM1 displaying the locations of the payloads identified using bottom-up analysis. Results from both batches of ADCs using both HCD-triggered EThcD and UVPD are combined. Modified lysines are shaded in gold.



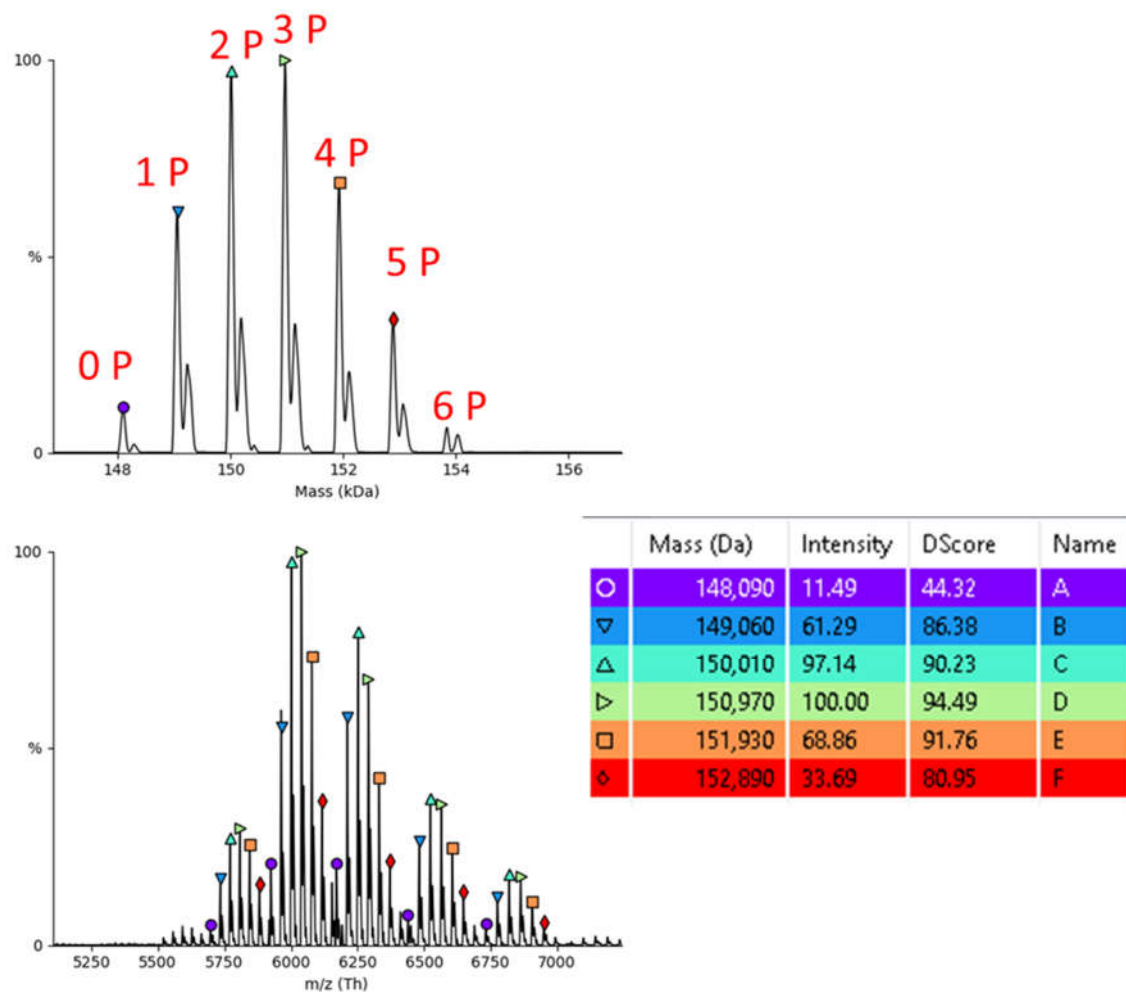

**Figure S16.** Mass spectrum of intact TDM-1 (lower) and deconvoluted mass spectrum (upper). The peaks are labelled with the number of attached payloads (P) in the deconvoluted mass spectrum.

## (A) Heavy chain

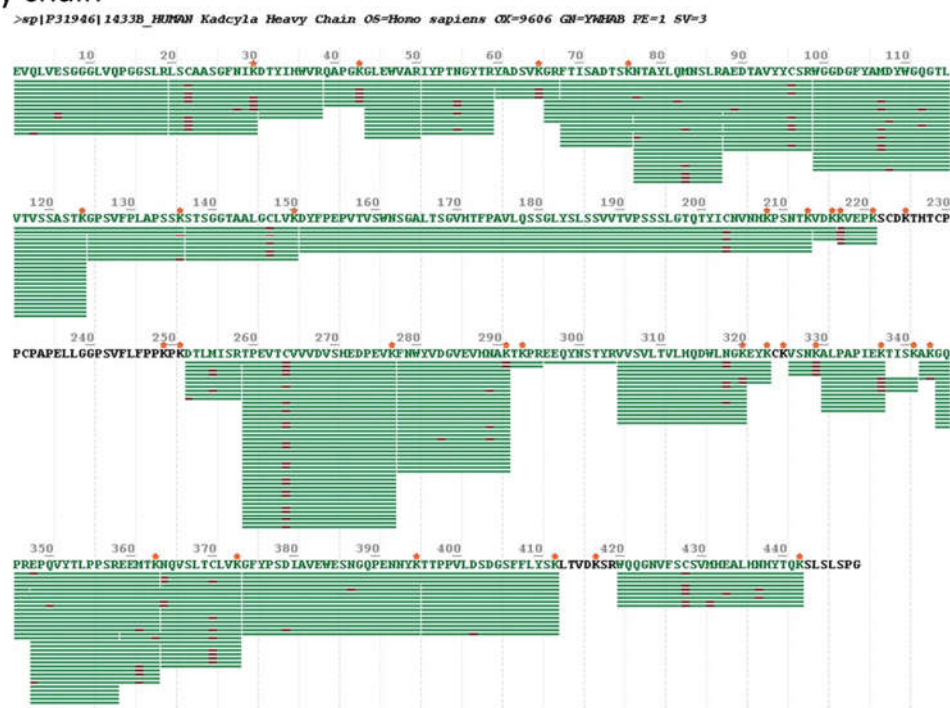

## (B) Light chain

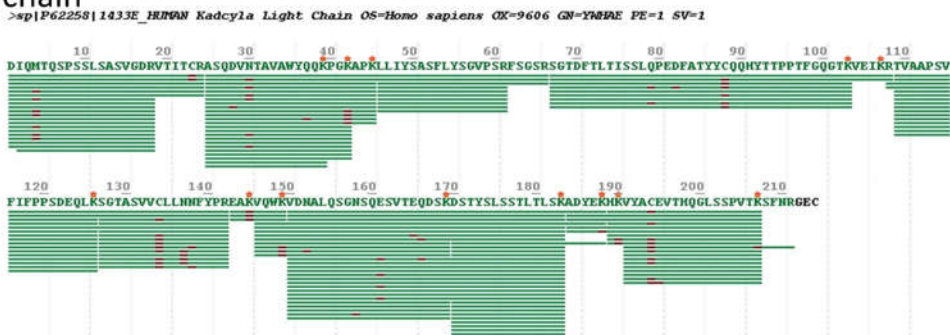

**Figure S17.** Peptide maps of the (A) heavy chain and (B) light chain of TDM-1 based on all identified peptides from the tryptic digest. All lysines are labelled with red stars. Lysines that are found to contain payloads are underlined with red dashes in the peptide sequences, all of which are marked with horizontal green bars.

**Table S1.** List of single payload-containing peptides identified with ProSight PD for UVPD replicates in primary sample. For each peptide, the residue to which the payload was localized, the theoretical mass, as well as the sequence coverage and retention time for each replicate are listed. Some replicate entries are blank in the case that a peptide was not identified in all five technical replicates.

| Annotated Sequence                                                                                                             | Payload Localization<br>(residue number on peptide sequence) | Payload Localization<br>(residue number on protein sequence) | Theo. Mass [Da] | Replicate 12 |      | Replicate 3 |      | Replicate 4 |      | Replicate 5 |      |              |
|--------------------------------------------------------------------------------------------------------------------------------|--------------------------------------------------------------|--------------------------------------------------------------|-----------------|--------------|------|-------------|------|-------------|------|-------------|------|--------------|
|                                                                                                                                |                                                              |                                                              |                 | SC           | RT   | SC          | RT   | SC          | RT   | SC          | RT   |              |
| ADYEKHK                                                                                                                        | K5                                                           | LC-K188                                                      | 1845.79         | 83%          | 26.1 | 83%         | 25.9 | 83%         | 26.0 | 83%         | 25.9 | 100%<br>26.2 |
| ADYEKHKVYACEVTHQGLSSPVTK                                                                                                       | K5                                                           | LC-K188                                                      | 3645.68         | 96%          | 25.1 | 100%        | 24.9 | 96%         | 25.0 | 100%        | 24.9 | 96%<br>25.1  |
| ADYEKHKVYACEVTHQGLSSPVTK                                                                                                       | K7                                                           | LC-K190                                                      | 3645.68         | 74%          | 25.8 | 70%         | 25.5 |             |      | 78%         | 25.6 | 52%<br>25.8  |
| ADYEKHKVYACEVTHQGLSSPVTKSFNRGEC                                                                                                | K5                                                           | LC-K188                                                      | 4439.00         | 90%          | 24.9 | 90%         | 24.8 | 93%         | 24.9 | 90%         | 24.8 | 90%<br>25.0  |
| ADYEKHKVYACEVTHQGLSSPVTKSFNRGEC                                                                                                | K7                                                           | LC-K190                                                      | 4439.00         | 67%          | 25.7 | 80%         | 25.5 | 73%         | 25.7 | 63%         | 25.4 | 63%<br>25.7  |
| AKGQPREPQVYTLPPSREEMTKNQVSLTCLVKGFYPSDIAVEWESNGQPENNYKTTTPVLDSDGSFFLYSKLTVDKSRWQQGNVFSCSVMHEALHNNHYTQK                         | K2                                                           | HC-K343                                                      | 12487.96        | 56%          | 30.2 | 58%         | 30.2 | 43%         | 30.4 | 28%         | 29.9 | 35%<br>30.5  |
| AKGQPREPQVYTLPPSREEMTKNQVSLTCLVKGFYPSDIAVEWESNGQPENNYKTTTPVLDSDGSFFLYSKLTVDKSRWQQGNVFSCSVMHEALHNNHYTQK                         | K54                                                          | HC-K395                                                      | 12487.96        | 71%          | 31.7 | 60%         | 31.4 | 68%         | 31.5 | 67%         | 31.4 | 77%<br>31.7  |
| AKGQPREPQVYTLPPSREEMTKNQVSLTCLVKGFYPSDIAVEWESNGQPENNYKTTTPVLDSDGSFFLYSKLTVDKSRWQQGNVFSCSVMHEALHNNHYTQK                         | K76                                                          | HC-K417                                                      | 12487.96        | 58%          | 32.8 | 73%         | 32.4 | 67%         | 32.6 | 66%         | 32.5 | 67%<br>32.9  |
| AKGQPREPQVYTLPPSREEMTKNQVSLTCLVKGFYPSDIAVEWESNGQPENNYKTTTPVLDSDGSFFLYSKLTVDKSRWQQGNVFSCSVMHEALHNNHYTQKSLSLSPG                  | K2                                                           | HC-K343                                                      | 13129.29        | 37%          | 30.4 | 28%         | 30.2 | 38%         | 30.4 | 52%         | 30.3 | 33%<br>30.7  |
| AKGQPREPQVYTLPPSREEMTKNQVSLTCLVKGFYPSDIAVEWESNGQPENNYKTTTPVLDSDGSFFLYSKLTVDKSRWQQGNVFSCSVMHEALHNNHYTQKSLSLSPG                  | K54                                                          | HC-K395                                                      | 13129.29        | 65%          | 32.0 | 75%         | 31.6 | 62%         | 31.9 | 74%         | 31.6 | 74%<br>31.8  |
| AKGQPREPQVYTLPPSREEMTKNQVSLTCLVKGFYPSDIAVEWESNGQPENNYKTTTPVLDSDGSFFLYSKLTVDKSRWQQGNVFSCSVMHEALHNNHYTQKSLSLSPG                  | K71 or K76                                                   | HC-K412 or HC-K417                                           | 13129.29        | 61%          | 33.1 | 67%         | 32.9 | 63%         | 33.1 | 66%         | 33.0 | 59%<br>33.3  |
| DIQMTQSPSSLSASVGDRVTITCRASQDVNTAVAWYQQKPGKAPKLLIYSASFLYSGVPSRFSGSRSGTDFTLTISSLQPEDFATYYCQQHYTTPPTFGQGTKVEIKRTVAAPSVFIFPPSDEQLK | K103 or K107                                                 | LC-K103 or LC-K107                                           | 14728.24        | 23%          | 33.3 | 30%         | 33.0 | 30%         | 33.0 | 22%         | 33.2 | 23%<br>33.4  |
| DIQMTQSPSSLSASVGDRVTITCRASQDVNTAVAWYQQKPGKAPKLLIYSASFLYSGVPSRFSGSRSGTDFTLTISSLQPEDFATYYCQQHYTTPPTFGQGTKVEIKRTVAAPSVFIFPPSDEQLK | K39, K42, or K45                                             | LC-K39, LC-K42, or LC-K45                                    | 14728.24        | 39%          | 34.2 | 36%         | 33.8 | 35%         | 33.9 | 35%         | 33.8 | 39%<br>34.0  |
| DSTYLSSTLTLSKADYEKHKVYACEVTHQGLSSPVTK                                                                                          | K19                                                          | LC-K188                                                      | 5129.42         | 54%          | 28.1 | 32%         | 27.8 | 43%         | 28.0 | 35%         | 27.9 | 41%<br>28.2  |
| DTLMISRTPEVTCVVDVSHEDPEVKFNWYVDGVEVHNAK                                                                                        | K26                                                          | HC-K277                                                      | 5512.56         | 62%          | 35.6 | 67%         | 35.4 | 74%         | 35.5 | 56%         | 35.5 | 69%<br>35.6  |
| DTYIHWVRQAPGKGLEWVARIYPTNGYTRYADSVK                                                                                            | K13                                                          | HC-K43                                                       | 5066.45         | 29%          | 31.5 | 44%         | 31.2 |             |      | 24%         | 31.2 | 50%<br>31.5  |
| DYFPEPVTVSWNSGALTSGVHTFPAVLQSSGLYSLSSVTVTPSSSLGTQTYICNVNHKPSNTK                                                                | K58                                                          | HC-K208                                                      | 7611.65         | 40%          | 36.0 | 34%         | 35.9 | 32%         | 36.3 | 39%         | 35.9 | 23%<br>36.1  |
| DYFPEPVTVSWNSGALTSGVHTFPAVLQSSGLYSLSSVTVTPSSSLGTQTYICNVNHKPSNTKVDK                                                             | K63                                                          | HC-K213                                                      | 7953.84         | 46%          | 34.5 | 45%         | 34.3 | 57%         | 35.2 | 48%         | 34.4 | 65%<br>34.6  |
| DYFPEPVTVSWNSGALTSGVHTFPAVLQSSGLYSLSSVTVTPSSSLGTQTYICNVNHKPSNTKVDKKVEPK                                                        | K58 or K63                                                   | HC-K208, or HC-K213                                          | 8535.19         |              |      | 66%         | 32.8 | 46%         | 33.1 | 44%         | 32.9 | 44%<br>33.1  |

|                                                                                                                                                                |                  |                                  |          |     |      |     |      |     |      |     |      |     |      |
|----------------------------------------------------------------------------------------------------------------------------------------------------------------|------------------|----------------------------------|----------|-----|------|-----|------|-----|------|-----|------|-----|------|
| DYFPEPVTVSWNSGALTSGVHTFPAVLQSSGLYSLSSVTVPSSSLGTQTYICNVNHKPS<br>NTKVDKKVEPK                                                                                     | K63, K66, or K67 | HC-K213, HC-<br>K216, or HC-K217 | 8535.19  | 36% | 33.0 | 26% | 31.7 | 51% | 31.7 | 24% | 31.5 | 34% | 33.2 |
| EVQLVESGGGLVQPGGSLRLSCAASGFNIKDTYIHWVRQAPGK                                                                                                                    | K30              | HC-K30                           | 5480.70  | 74% | 34.3 | 74% | 34.1 | 69% | 34.2 | 79% | 34.1 | 71% | 34.4 |
| EVQLVESGGGLVQPGGSLRLSCAASGFNIKDTYIHWVRQAPGKGLEWVARIYPTNGYT<br>RYADSVK                                                                                          | K30              | HC-K30                           | 8020.98  | 72% | 34.6 | 72% | 34.4 | 75% | 34.5 | 59% | 34.5 | 64% | 34.6 |
| EVQLVESGGGLVQPGGSLRLSCAASGFNIKDTYIHWVRQAPGKGLEWVARIYPTNGYT<br>RYADSVK                                                                                          | K43              | HC-K43                           | 8020.98  | 45% | 33.0 | 58% | 32.7 | 56% | 32.9 | 25% | 32.8 | 52% | 33.0 |
| EVQLVESGGGLVQPGGSLRLSCAASGFNIKDTYIHWVRQAPGKGLEWVARIYPTNGYT<br>RYADSVKGRFTISADTSKNTAYLQMNSLRAEDTAVYYCSRWGGDGFYAMDYWGQGT<br>LVTVSSASTKGPSVFPLAPSSK               | K30, or K43      | HC-K30 or HC-K43                 | 15667.61 | 25% | 35.8 | 20% | 35.7 | 33% | 35.7 | 36% | 35.7 | 32% | 35.8 |
| EVQLVESGGGLVQPGGSLRLSCAASGFNIKDTYIHWVRQAPGKGLEWVARIYPTNGYT<br>RYADSVKGRFTISADTSKNTAYLQMNSLRAEDTAVYYCSRWGGDGFYAMDYWGQGT<br>LVTVSSASTKGPSVFPLAPSSK               | K65              | HC-K65                           | 15667.61 | 53% | 34.9 | 43% | 34.6 | 50% | 34.9 | 45% | 34.8 | 50% | 34.9 |
| EVQLVESGGGLVQPGGSLRLSCAASGFNIKDTYIHWVRQAPGKGLEWVARIYPTNGYT<br>RYADSVKGRFTISADTSKNTAYLQMNSLRAEDTAVYYCSRWGGDGFYAMDYWGQGT<br>LVTVSSASTKGPSVFPLAPSSK               | K76              | HC-K76                           | 15667.61 | 53% | 34.9 | 46% | 35.0 | 47% | 34.8 | 39% | 34.8 | 44% | 34.9 |
| EVQLVESGGGLVQPGGSLRLSCAASGFNIKDTYIHWVRQAPGKGLEWVARIYPTNGYT<br>RYADSVKGRFTISADTSKNTAYLQMNSLRAEDTAVYYCSRWGGDGFYAMDYWGQGT<br>LVTVSSASTKGPSVFPLAPSSKSTSGGTAALGCLVK | K65 or K76       | HC-K65 or HC-K76                 | 16913.25 | 11% | 35.0 | 40% | 34.6 | 30% | 34.7 | 24% | 34.7 | 25% | 34.7 |
| GLEWVARIYPTNGYTRYADSVKGRFTISADTSKNTAYLQMNSLRAEDTAVYYCSRWG<br>GDGFYAMDYWGQGT                                                                                    | K22              | HC-K65                           | 11161.28 | 42% | 36.3 | 51% | 36.1 | 64% | 36.2 | 68% | 36.2 | 62% | 36.3 |
| GLEWVARIYPTNGYTRYADSVKGRFTISADTSKNTAYLQMNSLRAEDTAVYYCSRWG<br>GDGFYAMDYWGQGT                                                                                    | K33              | HC-K76                           | 11161.28 | 48% | 36.3 | 50% | 36.1 | 64% | 36.2 | 71% | 36.2 | 58% | 36.2 |
| GQPREPQVYTLPPSREEMTKNQVSLTCLVKGFYPSDIAVEWESNGQPENNYKTTTPVL<br>DSDGSFFLYSKLTVDKSRWQQGNVFSCSVMHEALHNHYTQK                                                        | K52              | HC-K395                          | 12288.82 | 58% | 32.4 |     |      | 69% | 32.4 | 60% | 32.3 | 59% | 32.4 |
| GQPREPQVYTLPPSREEMTKNQVSLTCLVKGFYPSDIAVEWESNGQPENNYKTTTPVL<br>DSDGSFFLYSKLTVDKSRWQQGNVFSCSVMHEALHNHYTQK                                                        | K69 or K74       | HC-K412 or HC-<br>K417           | 12288.82 | 43% | 33.4 | 54% | 33.3 | 45% | 33.5 | 47% | 33.2 | 56% | 33.5 |
| GQPREPQVYTLPPSREEMTKNQVSLTCLVKGFYPSDIAVEWESNGQPENNYKTTTPVL<br>DSDGSFFLYSKLTVDKSRWQQGNVFSCSVMHEALHNHYTQKSLSLSPG                                                 | K52              | HC-K395                          | 12930.16 | 62% | 32.6 |     |      | 49% | 32.7 | 34% | 32.8 | 11% | 33.8 |
| GQPREPQVYTLPPSREEMTKNQVSLTCLVKGFYPSDIAVEWESNGQPENNYKTTTPVL<br>DSDGSFFLYSKLTVDKSRWQQGNVFSCSVMHEALHNHYTQKSLSLSPG                                                 | K69 or K74       | HC-K412 or HC-<br>K417           | 12930.16 | 55% | 33.7 | 64% | 33.6 | 39% | 33.6 | 61% | 33.5 | 65% | 33.8 |
| GRFTISADTSKNTAYLQMNSLRAEDTAVYYCSRWGGDGFYAMDYWGQGT                                                                                                              | K11              | HC-K76                           | 8621.00  | 73% | 37.5 | 67% | 37.3 | 69% | 37.3 | 76% | 37.4 | 61% | 37.2 |
| GRFTISADTSKNTAYLQMNSLRAEDTAVYYCSRWGGDGFYAMDYWGQGT                                                                                                              | K59              | HC-K124                          | 9866.64  | 46% | 36.9 |     |      | 56% | 36.9 | 33% | 36.9 | 30% | 37.0 |
| HKVYACEVTHQGLSPPVTK                                                                                                                                            | K2               | LC-K190                          | 3039.42  | 89% | 26.3 | 72% | 26.1 | 89% | 26.2 | 83% | 26.0 | 72% | 26.3 |
| HKVYACEVTHQGLSPPVTKSFNRGEC                                                                                                                                     | K19              | LC-K207                          | 3832.73  | 44% | 26.7 | 52% | 26.5 | 52% | 26.6 | 52% | 26.4 | 60% | 26.7 |
| LTVDKSRWQQGNVFSCSVMHEALHNHYTQK                                                                                                                                 | K5               | HC-K417                          | 4499.06  | 93% | 28.6 | 93% | 28.4 | 90% | 28.5 | 90% | 28.5 | 86% | 28.7 |
| NTAYLQMNSLRAEDTAVYYCSRWGGDGFYAMDYWGQGT                                                                                                                         | K48              | HC-K124                          | 7457.41  | 37% | 38.9 | 27% | 38.8 | 22% | 39.3 | 46% | 38.9 | 46% | 39.0 |
| NTAYLQMNSLRAEDTAVYYCSRWGGDGFYAMDYWGQGT                                                                                                                         | K60              | HC-K136                          | 8703.05  | 38% | 38.2 |     |      |     |      | 38% | 38.1 | 38% | 38.3 |
| SCDKTHTCPPCPAPELLGGPSVFLFPPKPK                                                                                                                                 | K4               | HC-K225                          | 4118.93  | 79% | 34.1 | 59% | 34.7 | 66% | 34.1 | 62% | 34.0 | 86% | 34.2 |

|                                                                                       |                             |                                     |         |     |      |     |      |      |      |     |      |     |      |  |
|---------------------------------------------------------------------------------------|-----------------------------|-------------------------------------|---------|-----|------|-----|------|------|------|-----|------|-----|------|--|
| STSGGTAALGCLVKDYFPEPVTVSWNSGALTSGVHTFPAVLQSSGLYSLSSVVTVPSSSLGTQTYICNVNHKPSNTKVDKKVEPK | K80, K81, or K85            | HC-K216, HC-K217, or HC-K221        | 9780.83 | 38% | 33.8 | 30% | 33.6 | 21%  | 33.7 | 44% | 33.7 |     |      |  |
| THTCPPCPAPELLGGPSVFLFPPKPK                                                            | K24                         | HC-K249                             | 3685.77 | 88% | 37.9 | 84% | 37.7 | 72%  | 37.9 | 76% | 37.7 | 72% | 37.9 |  |
| THTCPPCPAPELLGGPSVFLFPPKPKDTLMISRTPEVTCVVVDVSHEDPEVK                                  | K26                         | HC-K251                             | 6565.18 | 69% | 35.4 | 51% | 35.3 | 57%  | 35.3 | 55% | 35.3 | 61% | 35.4 |  |
| THTCPPCPAPELLGGPSVFLFPPKPKDTLMISRTPEVTCVVVDVSHEDPEVKFNWYVDGVEVHNAK                    | K26                         | HC-K249                             | 8223.96 | 43% | 35.4 | 39% | 35.2 | 49%  | 35.4 | 29% | 35.3 | 66% | 35.4 |  |
| THTCPPCPAPELLGGPSVFLFPPKPKDTLMISRTPEVTCVVVDVSHEDPEVKFNWYVDGVEVHNAK                    | K52                         | HC-K277                             | 8223.96 | 55% | 35.3 | 49% | 35.2 | 37%  | 35.3 | 40% | 35.4 | 54% | 35.4 |  |
| VSNKALPAIEK                                                                           | K4                          | HC-K329                             | 2222.10 | 82% | 30.0 | 91% | 29.8 | 100% | 29.9 | 91% | 29.8 | 91% | 30.1 |  |
| TKPREEQYNSTYRVVSVLTVLHQDWLNGK                                                         | K2 and G0F N-Glycan         | HC-K293 and G0F N-Glycan            | 5860.69 | 68% | 31.5 | 61% | 32.1 | 71%  | 31.4 | 54% | 32.2 | 71% | 31.5 |  |
| TKPREEQYNSTYRVVSVLTVLHQDWLNGK                                                         | K2 and G1F N-Glycan         | HC-K293 and G1F N-Glycan            | 6022.74 | 68% | 31.4 | 64% | 31.1 | 68%  | 31.7 | 82% | 31.2 | 71% | 31.4 |  |
| FNWYVDGVEVHNAKTKPREEQYNSTYRVVSVLTVLHQDWLNGK                                           | K14 or K16 and G0F N-Glycan | HC-K291 or HC-K293 and G0F N-Glycan | 7519.47 | 62% | 31.5 | 76% | 31.3 | 79%  | 31.4 | 41% | 31.4 | 64% | 31.6 |  |
| FNWYVDGVEVHNAKTKPREEQYNSTYRVVSVLTVLHQDWLNGK                                           | K14 or K16 and G1F N-Glycan | HC-K291 or HC-K293 and G0F N-Glycan | 7681.52 | 69% | 31.5 | 45% | 31.2 | 74%  | 31.3 | 71% | 31.3 | 64% | 31.6 |  |



**Table S2.** List of single payload-containing peptides identified with ProSight PD for EThcD replicates in primary sample. For each peptide, the residue to which the payload was localized, the theoretical mass, as well as the sequence coverage and retention time for each replicate are listed. Some replicate entries are blank in the case that a peptide was not identified in all five technical replicates.

| Annotated Sequence                                                                                            | Payload Localization<br>(residue number<br>on peptide<br>sequence) | Payload Localization<br>(residue number<br>on protein<br>sequence) | Theo. Mass<br>[Da] | Replicate 12 |      | Replicate 3 |      | Replicate 4 |      | Replicate 5 |      |
|---------------------------------------------------------------------------------------------------------------|--------------------------------------------------------------------|--------------------------------------------------------------------|--------------------|--------------|------|-------------|------|-------------|------|-------------|------|
|                                                                                                               |                                                                    |                                                                    |                    | SC           | RT   | SC          | RT   | SC          | RT   | SC          | RT   |
| ADYEKHK                                                                                                       | K5                                                                 | LC-K188                                                            | 1845.79            | 100%         | 25.9 | 83%         | 26.1 | 100%        | 26.1 | 83%         | 26.1 |
| ADYEKHKVYACEVTHQGLSSPVTK                                                                                      | K5                                                                 | LC-K188                                                            | 3645.68            | 83%          | 24.9 | 91%         | 25.1 | 83%         | 25.1 | 78%         | 25.0 |
| ADYEKHKVYACEVTHQGLSSPVTK                                                                                      | K7                                                                 | LC-K190                                                            | 3645.68            | 74%          | 25.0 | 57%         | 25.8 | 83%         | 25.8 | 74%         | 25.1 |
| ADYEKHKVYACEVTHQGLSSPVTKSFNRGEC                                                                               | K5                                                                 | LC-K188                                                            | 4439.00            | 77%          | 24.8 | 77%         | 25.0 | 80%         | 25.0 | 80%         | 24.9 |
| ADYEKHKVYACEVTHQGLSSPVTKSFNRGEC                                                                               | K7                                                                 | LC-K190                                                            | 4439.00            | 57%          | 25.5 | 63%         | 25.7 | 63%         | 25.0 | 67%         | 25.5 |
| AKGQPREPQVYTLPPSREEMTK                                                                                        | K2                                                                 | HC-K343                                                            | 3497.67            | 62%          | 25.9 | 38%         | 26.2 | 57%         | 26.1 | 29%         | 26.1 |
| AKGQPREPQVYTLPPSREEMTKNQVSLTCLVKGFYPSDIAVEWESNGQPENNYKTTPPVLDSDGSFFLYSKLTVDKSRWQQGNVFCSCVMHEALHNNHYTQK        | K2                                                                 | HC-K343                                                            | 12487.96           |              |      | 14%         | 30.6 | 29%         | 30.4 | 13%         | 30.4 |
| AKGQPREPQVYTLPPSREEMTKNQVSLTCLVKGFYPSDIAVEWESNGQPENNYKTTPPVLDSDGSFFLYSKLTVDKSRWQQGNVFCSCVMHEALHNNHYTQK        | K54                                                                | HC-K395                                                            | 12487.96           | 42%          | 31.5 | 29%         | 31.7 | 50%         | 31.6 | 42%         | 31.5 |
| AKGQPREPQVYTLPPSREEMTKNQVSLTCLVKGFYPSDIAVEWESNGQPENNYKTTPPVLDSDGSFFLYSKLTVDKSRWQQGNVFCSCVMHEALHNNHYTQK        | K71 or K76                                                         | HC-K412 or HC-K417                                                 | 12487.96           | 47%          | 32.7 | 45%         | 32.8 | 45%         | 32.7 | 46%         | 32.6 |
| AKGQPREPQVYTLPPSREEMTKNQVSLTCLVKGFYPSDIAVEWESNGQPENNYKTTPPVLDSDGSFFLYSKLTVDKSRWQQGNVFCSCVMHEALHNNHYTQKSLSLSPG | K2                                                                 | HC-K343                                                            | 13129.29           | 21%          | 30.3 | 26%         | 30.5 | 25%         | 30.5 | 29%         | 30.4 |
| AKGQPREPQVYTLPPSREEMTKNQVSLTCLVKGFYPSDIAVEWESNGQPENNYKTTPPVLDSDGSFFLYSKLTVDKSRWQQGNVFCSCVMHEALHNNHYTQKSLSLSPG | K54                                                                | HC-K395                                                            | 13129.29           | 32%          | 31.9 | 31%         | 32.0 | 39%         | 31.8 | 33%         | 31.6 |
| AKGQPREPQVYTLPPSREEMTKNQVSLTCLVKGFYPSDIAVEWESNGQPENNYKTTPPVLDSDGSFFLYSKLTVDKSRWQQGNVFCSCVMHEALHNNHYTQKSLSLSPG | K71 or K76                                                         | HC-K412 or HC-K417                                                 | 13129.29           | 43%          | 33.1 | 41%         | 33.1 | 41%         | 33.2 | 36%         | 33.3 |
| ALPAPIEKTISK                                                                                                  | K8                                                                 | HC-K337                                                            | 2223.12            | 64%          | 32.4 | 55%         | 32.0 |             |      |             | 64%  |
| DIQMTQSPSSLSASVGDRVTITCRASQDVNTAVAWYQQKPGKAPKLLIYSASFLYSGVP                                                   | K103                                                               | LC-K103                                                            | 14728.24           | 21%          | 33.1 | 18%         | 33.5 | 21%         | 33.3 | 15%         | 33.3 |
| SRFSGSRSGTDFTLTISSLQPEDFATYYCQQHYTTPPTFGQGTKVEIKRTVAAPSVFIFPPSDEQLK                                           |                                                                    |                                                                    |                    |              |      |             |      |             |      |             |      |
| DIQMTQSPSSLSASVGDRVTITCRASQDVNTAVAWYQQKPGKAPKLLIYSASFLYSGVP                                                   | K39, K42, or K45                                                   | LC-K39, LC-K42, or LC-K45                                          | 14728.24           | 28%          | 34.1 | 28%         | 34.1 | 24%         | 33.6 | 23%         | 34.1 |
| SRFSGSRSGTDFTLTISSLQPEDFATYYCQQHYTTPPTFGQGTKVEIKRTVAAPSVFIFPPSDEQLK                                           |                                                                    |                                                                    |                    |              |      |             |      |             |      |             |      |
| DSTYLSSTLTLSKADYEKHKVYACEVTHQGLSSPVTK                                                                         | K19                                                                | LC-K188                                                            | 5129.42            | 41%          | 27.9 | 65%         | 28.1 | 62%         | 28.1 | 57%         | 28.0 |
| DTLMISRTPEVTCVVVDVSHEDPEVKFNWYVDGVEVHNAK                                                                      | K26                                                                | HC-K277                                                            | 5512.56            | 51%          | 35.6 | 62%         | 35.8 | 49%         | 35.7 | 44%         | 35.6 |
| DTYIHWVRQAPGKGLEWVARIYPTNGYTRYADSVK                                                                           | K13                                                                | HC-K43                                                             | 5066.45            | 24%          | 31.4 | 41%         | 31.6 |             |      | 35%         | 31.3 |
| DYFPEPVTVSWNSGALTSGVHTFPAVLQSSGLYSLSSVTVTPSSSLGTQTYICNVNHKPSNTKVDK                                            | K58                                                                | HC-K208                                                            | 7953.84            | 20%          | 34.7 | 34%         | 34.7 | 23%         | 34.6 | 25%         | 34.5 |
| DYFPEPVTVSWNSGALTSGVHTFPAVLQSSGLYSLSSVTVTPSSSLGTQTYICNVNHKPSNTKVDKKVEPK                                       | K58 or K63                                                         | HC-K208, or HC-K213                                                | 8535.19            | 46%          | 33.1 | 41%         | 33.2 | 59%         | 33.1 | 31%         | 33.1 |

|                                                                                                                                                                |                  |                                  |          |     |      |     |      |     |      |     |      |     |      |
|----------------------------------------------------------------------------------------------------------------------------------------------------------------|------------------|----------------------------------|----------|-----|------|-----|------|-----|------|-----|------|-----|------|
| DYFPEPVTVSWNSGALTSVHTFPAVLQSSGLYSLSSVTVPSSSLGTQTYICNVNHKPS<br>NTKVDKKVEPK                                                                                      | K63, K66, or K67 | HC-K213, HC-<br>K216, or HC-K217 | 8535.19  | 46% | 31.6 | 59% | 31.8 | 30% | 31.7 | 29% | 31.6 | 33% | 31.6 |
| EVQLVESGGGLVQPGGSLRLSCAASGFNIKDTYIHWVRQAPGK                                                                                                                    | K30              | HC-K30                           | 5480.70  | 71% | 34.2 | 76% | 34.4 | 69% | 34.5 | 67% | 34.3 | 74% | 34.2 |
| EVQLVESGGGLVQPGGSLRLSCAASGFNIKDTYIHWVRQAPGKGLEWVARIYPTNGYT<br>RYADSVK                                                                                          | K30              | HC-K30                           | 8020.98  | 55% | 34.5 | 59% | 34.6 | 47% | 34.7 | 64% | 34.6 | 59% | 34.6 |
| EVQLVESGGGLVQPGGSLRLSCAASGFNIKDTYIHWVRQAPGKGLEWVARIYPTNGYT<br>RYADSVK                                                                                          | K43              | HC-K43                           | 8020.98  |     |      | 48% | 33.0 | 53% | 33.0 | 42% | 33.0 | 42% | 32.9 |
| EVQLVESGGGLVQPGGSLRLSCAASGFNIKDTYIHWVRQAPGKGLEWVARIYPTNGYT<br>RYADSVKGRFTISADTSKNTAYLQMNSLRAEDTAVYYCSRWGGDGFYAMDYWGQGT<br>LVTVSSASTKGPSVFPLAPSSK               | K30              | HC-K30                           | 15667.61 | 19% | 35.7 | 17% | 35.9 | 21% | 35.8 | 22% | 35.8 | 21% | 35.8 |
| EVQLVESGGGLVQPGGSLRLSCAASGFNIKDTYIHWVRQAPGKGLEWVARIYPTNGYT<br>RYADSVKGRFTISADTSKNTAYLQMNSLRAEDTAVYYCSRWGGDGFYAMDYWGQGT<br>LVTVSSASTKGPSVFPLAPSSK               | K65              | HC-K65                           | 15667.61 | 31% | 34.7 | 30% | 35.0 | 33% | 34.8 | 29% | 34.8 | 30% | 34.9 |
| EVQLVESGGGLVQPGGSLRLSCAASGFNIKDTYIHWVRQAPGKGLEWVARIYPTNGYT<br>RYADSVKGRFTISADTSKNTAYLQMNSLRAEDTAVYYCSRWGGDGFYAMDYWGQGT<br>LVTVSSASTKGPSVFPLAPSSK               | K76              | HC-K76                           | 15667.61 | 30% | 34.7 | 25% | 35.0 | 33% | 34.8 | 22% | 34.8 | 23% | 34.7 |
| EVQLVESGGGLVQPGGSLRLSCAASGFNIKDTYIHWVRQAPGKGLEWVARIYPTNGYT<br>RYADSVKGRFTISADTSKNTAYLQMNSLRAEDTAVYYCSRWGGDGFYAMDYWGQGT<br>LVTVSSASTKGPSVFPLAPSSKSTSGGTAALGCLVK | K65 or K76       | HC-K65 or HC-K76                 | 16913.25 | 9%  | 34.7 | 24% | 34.8 | 13% | 34.8 | 26% | 34.7 |     |      |
| GLEWVARIYPTNGYTRYADSVKGRFTISADTSKNTAYLQMNSLRAEDTAVYYCSRWG<br>DGFYAMDYWGQGT LVTVSSASTKGPSVFPLAPSSK                                                              | K22              | HC-K65                           | 11161.28 | 34% | 36.2 | 42% | 36.3 | 58% | 36.2 | 55% | 36.3 | 47% | 36.2 |
| GLEWVARIYPTNGYTRYADSVKGRFTISADTSKNTAYLQMNSLRAEDTAVYYCSRWG<br>DGFYAMDYWGQGT LVTVSSASTKGPSVFPLAPSSK                                                              | K33              | HC-K76                           | 11161.28 |     |      | 37% | 36.4 |     |      | 58% | 36.3 | 37% | 36.2 |
| GQPREPQVYTLPPSREEMTKNQVSLTCLVKGFYPSDIAVEWESNGQPENNYKTTTPVL<br>DSDGSFFLYSKLTVDKSRWQQGNVFSCSVMHEALHNHYTQK                                                        | K52              | HC-K395                          | 12288.82 | 26% | 32.6 | 48% | 32.6 | 36% | 32.6 | 34% | 32.3 | 34% | 32.7 |
| GQPREPQVYTLPPSREEMTKNQVSLTCLVKGFYPSDIAVEWESNGQPENNYKTTTPVL<br>DSDGSFFLYSKLTVDKSRWQQGNVFSCSVMHEALHNHYTQK                                                        | K69 or K74       | HC-K412 or HC-<br>K417           | 12288.82 | 39% | 33.4 | 41% | 33.5 | 31% | 33.4 | 30% | 33.5 | 33% | 33.5 |
| GQPREPQVYTLPPSREEMTKNQVSLTCLVKGFYPSDIAVEWESNGQPENNYKTTTPVL<br>DSDGSFFLYSKLTVDKSRWQQGNVFSCSVMHEALHNHYTQKSLSPG                                                   | K69 or K74       | HC-K412 or HC-<br>K417           | 12930.16 | 33% | 33.6 | 37% | 33.9 | 31% | 33.8 | 22% | 33.8 | 31% | 33.6 |
| GRFTISADTSKNTAYLQMNSLRAEDTAVYYCSRWGGDGFYAMDYWGQGT LVTVSSAS<br>TKGPSVFPLAPSSK                                                                                   | K11              | HC-K76                           | 8621.00  | 83% | 37.2 | 86% | 37.1 | 79% | 37.3 | 87% | 37.1 | 81% | 37.3 |
| GRFTISADTSKNTAYLQMNSLRAEDTAVYYCSRWGGDGFYAMDYWGQGT LVTVSSAS<br>TKGPSVFPLAPSSKSTSGGTAALGCLVK                                                                     | K59              | HC-K124                          | 9866.64  | 44% | 36.8 | 52% | 37.0 |     |      | 23% | 37.3 | 37% | 36.9 |
| HKVYACEVTHQGLSSPVTK                                                                                                                                            | K2               | LC-K190                          | 3039.42  | 78% | 26.0 | 83% | 26.3 | 89% | 26.2 | 78% | 26.1 | 78% | 26.1 |
| HKVYACEVTHQGLSSPVTKSFNRGEC                                                                                                                                     | K19              | LC-K207                          | 3832.73  | 40% | 26.4 | 36% | 26.7 | 40% | 26.7 | 56% | 26.5 |     |      |
| LTVDKSRWQQGNVFSCSVMHEALHNHYTQK                                                                                                                                 | K5               | HC-K417                          | 4499.06  | 93% | 28.4 | 86% | 28.7 | 90% | 28.6 | 97% | 28.5 | 90% | 28.5 |
| NTAYLQMNSLRAEDTAVYYCSRWGGDGFYAMDYWGQGT LVTVSSASTKGPSVFPLA<br>PSSK                                                                                              | K48              | HC-K124                          | 7457.41  | 46% | 39.0 | 61% | 39.1 | 53% | 39.4 | 49% | 39.0 | 58% | 38.9 |
| NTAYLQMNSLRAEDTAVYYCSRWGGDGFYAMDYWGQGT LVTVSSASTKGPSVFPLA<br>PSSKSTSGGTAALGCLVK                                                                                | K60              | HC-K136                          | 8703.05  | 26% | 38.1 | 22% | 38.3 | 11% | 38.3 | 15% | 38.5 | 26% | 38.1 |
| SCDKTHTCPPCPAPELLGGPSVFLFPPKPK                                                                                                                                 | K4               | HC-K225                          | 4118.93  | 79% | 34.2 | 83% | 34.3 | 90% | 34.2 | 83% | 34.1 | 90% | 34.1 |
| SGTASVVCLLNNFYPREAKVQWKVDNALQSGNSQESVTEQDSKDSYSLSTLTLSKA<br>DYEKHKVYACEVTHQGLSSPVTK                                                                            | K62              | LC-K188                          | 9837.70  | 38% | 28.4 | 43% | 28.6 | 25% | 28.5 | 26% | 28.5 | 40% | 28.4 |
| THTCPPCPAPELLGGPSVFLFPPKPK                                                                                                                                     | K24              | HC-K249                          | 3685.77  | 72% | 37.7 | 64% | 38.0 | 64% | 38.0 | 72% | 38.0 | 68% | 38.0 |

|                                                                    |                      |                          |         |     |      |     |      |     |      |     |      |     |      |
|--------------------------------------------------------------------|----------------------|--------------------------|---------|-----|------|-----|------|-----|------|-----|------|-----|------|
| THTCPPCPAPELLGGPSVFLFPPKPKDTLMISRTPEVTCVVVDVSHEDPEVK               | K24 or K26           | HC-K249 or HC-K251       | 6565.18 | 43% | 35.2 | 49% | 35.4 | 41% | 35.5 | 37% | 35.4 | 39% | 35.4 |
| THTCPPCPAPELLGGPSVFLFPPKPKDTLMISRTPEVTCVVVDVSHEDPEVKFNWYVDGVEVHNAK | K24 or K26           | HC-K249 or HC-K251       | 8223.96 | 23% | 35.5 |     |      | 32% | 35.6 | 26% | 35.6 | 28% | 35.5 |
| THTCPPCPAPELLGGPSVFLFPPKPKDTLMISRTPEVTCVVVDVSHEDPEVKFNWYVDGVEVHNAK | K52                  | HC-K277                  | 8223.96 | 46% | 35.2 | 43% | 35.6 | 39% | 35.4 | 26% | 35.5 | 45% | 35.3 |
| VSNKALPAIEK                                                        | K4                   | HC-K329                  | 2222.10 | 91% | 29.8 | 82% | 30.1 | 73% | 30.0 | 91% | 29.9 | 91% | 29.9 |
| VYACEVTHQGLSSPVTKSFNRGEC                                           | K17                  | LC-K207                  | 3567.58 | 30% | 29.8 | 26% | 30.1 | 26% | 30.0 | 35% | 29.9 |     |      |
| TKPREEQYNSTYRVVSVLTVLHQDWLNGK                                      | K2 and G0F N-Glycan  | HC-K293 and G0F N-Glycan | 5860.69 | 82% | 31.2 | 82% | 31.9 | 82% | 31.8 | 82% | 31.4 | 64% | 31.4 |
| TKPREEQYNSTYRVVSVLTVLHQDWLNGK                                      | K2 and G1F N-Glycan  | HC-K293 and G1F N-Glycan | 6022.74 | 71% | 31.7 | 75% | 31.4 | 79% | 31.3 | 75% | 31.2 | 71% | 31.3 |
| FNWYVDGVEVHNAKTKPREEQYNSTYRVVSVLTVLHQDWLNGK                        | K14 and G0F N-Glycan | HC-K291 and G0F N-Glycan | 7519.47 | 71% | 31.4 | 79% | 31.6 | 76% | 31.6 | 64% | 31.4 | 81% | 31.4 |
| FNWYVDGVEVHNAKTKPREEQYNSTYRVVSVLTVLHQDWLNGK                        | K14 and G1F N-Glycan | HC-K291 and G0F N-Glycan | 7681.52 | 64% | 31.3 | 79% | 31.5 | 62% | 31.6 | 71% | 31.4 | 67% | 31.4 |

**Table S4.** List of two payload-containing peptides identified with ProSight PD for UVPD replicates in primary sample. For each peptide, the residue to which the payload was localized, the theoretical mass, as well as the sequence coverage and retention time for each replicate are listed. Some replicate entries are blank in the case that a peptide was not identified in all five technical replicates.

| Annotated Sequence                                                                                    | Payload Localization<br>(residue number on peptide sequence) | Payload Localization<br>(residue number on protein sequence) | Theo. Mass [Da] | Replicate 1 |      | Replicate 2 |      | Replicate 3 |      | Replicate 4 |      | Replicate 5 |      |
|-------------------------------------------------------------------------------------------------------|--------------------------------------------------------------|--------------------------------------------------------------|-----------------|-------------|------|-------------|------|-------------|------|-------------|------|-------------|------|
|                                                                                                       |                                                              |                                                              |                 | SC          | RT   |
| AKGQPREPQVYTLPPSREEMTKNQVSLTCLVKGFYPSDIAVEWESNGQPENNYkTTPPVLDSDGSFFLYSKLTVDkSRWQQGNVFSCSVMHEALHNHYTQK | K54 and K71 or K76                                           | HC-K395 and HC-K412 or HC-K417                               | 13444.32        | 76%         | 38.5 | 78%         | 38.3 | 63%         | 38.3 | 59%         | 38.6 | 40%         | 38.5 |
| EVQLVESGGGLVQPGGSLRLSCAASGFNIKDTYIHWVRQAPGkGLEWVARIYPTNGYT<br>RYADSVK                                 | K30 and K43                                                  | HC-K30 and HC-K43                                            | 8977.34         | 53%         | 41.8 | 31%         | 41.6 | 16%         | 41.7 | 38%         | 41.7 | 42%         | 41.9 |
| GFYPSDIAVEWESNGQPENNYkTTPPVLDSDGSFFLYSKLTVDkSRWQQGNVFSCSVM<br>HEALHNHYTQK                             | K22 and K44                                                  | HC-K395 and HC-K417                                          | 9835.44         | 65%         | 40.6 | 40%         | 40.5 | 72%         | 40.6 | 50%         | 40.6 | 69%         | 40.9 |
| GQPREPQVYTLPPSREEMTKNQVSLTCLVKGFYPSDIAVEWESNGQPENNYkTTPPVLDSDGSFFLYSKLTVDKSRWQQGNVFSCSVMHEALHNHYTQK   | K52 and K69 or K74                                           | HC-K395 and HC-K412 or HC-K417                               | 13245.19        | 17%         | 39.0 |             |      |             |      | 35%         | 38.8 | 63%         | 38.8 |
| NQVSLTCLVKGFYPSDIAVEWESNGQPENNYkTTPPVLDSDGSFFLYSKLTVDKSRWQQGNVFSCSVMHEALHNHYTQK                       | K32 and K49 or K54                                           | HC-K395 and HC-K412 or HC-K417                               | 10921.03        | 63%         | 40.5 | 35%         | 40.4 | 56%         | 40.5 | 39%         | 40.5 | 51%         | 40.7 |
| THTCPPCPAPELLGGPSVFLFPPKPkDTLMISRTPEVTCVVVDVSHEDPEVKFNWYVDG<br>VEVHNAK                                | K26 and K52                                                  | HC-K251 and HC-K277                                          | 9180.32         | 25%         | 41.8 | 34%         | 41.8 | 46%         | 41.8 | 28%         | 41.9 | 15%         | 42.0 |

**Table S5.** List of two payload-containing peptides identified with ProSight PD for EThcD replicates in primary sample. For each peptide, the residue to which the payload was localized, the theoretical mass, as well as the sequence coverage and retention time for each replicate are listed. Some replicate entries are blank in the case that a peptide was not identified in all five technical replicates.

| Annotated Sequence                                                                                    | Payload Localization<br>(residue number on peptide sequence) | Payload Localization<br>(residue number on protein sequence) | Theo. Mass [Da] | Replicate 1 |      | Replicate 2 |      | Replicate 3 |      | Replicate 4 |      | Replicate 5 |      |
|-------------------------------------------------------------------------------------------------------|--------------------------------------------------------------|--------------------------------------------------------------|-----------------|-------------|------|-------------|------|-------------|------|-------------|------|-------------|------|
|                                                                                                       |                                                              |                                                              |                 | SC          | RT   |
| ADYEKHKVYACEVTHQGLSSPVTK                                                                              | K5 and K7                                                    | LC-K188 and LC-K190                                          | 4602.05         | 30%         | 37.3 |             |      | 35%         | 38.0 | 35%         | 37.3 |             |      |
| AKGQPREPQVYTLPPSREEMTKNQVSLTCLVKGFYPSDIAVEWESNGQPENNYkTTPPVLDSDGSFFLYSKLTVDkSRWQQGNVFSCSVMHEALHNHYTQK | K54 and K71 or K76                                           | HC-K395 and HC-K412 or HC-K417                               | 13444.32        | 38%         | 38.3 | 35%         | 38.0 | 35%         | 38.5 | 38%         | 38.1 | 42%         | 38.3 |
| EVQLVESGGGLVQPGGSLRLSCAASGFNIKDTYIHWVRQAPGkGLEWVARIYPTNGYT RYADSVK                                    | K30 and K43                                                  | HC-K30 and HC-K43                                            | 8977.34         |             |      | 23%         | 41.9 | 20%         | 41.8 | 25%         | 41.9 |             |      |
| GFYPSDIAVEWESNGQPENNYkTTPPVLDSDGSFFLYSKLTVDkSRWQQGNVFSCSVMHEALHNHYTQK                                 | K22 and K44                                                  | HC-K395 and HC-K417                                          | 9835.44         | 54%         | 40.6 | 56%         | 40.6 | 52%         | 40.6 | 49%         | 40.5 | 56%         | 40.6 |
| GQPREPQVYTLPPSREEMTKNQVSLTCLVKGFYPSDIAVEWESNGQPENNYkTTPPVLDSDGSFFLYSKLTVDKSRWQQGNVFSCSVMHEALHNHYTQK   | K52 and K69 or K74                                           | HC-K395 and HC-K412 or HC-K417                               | 13245.19        |             |      |             |      | 28%         | 38.8 | 34%         | 38.9 | 16%         | 38.8 |
| NQVSLTCLVKGFYPSDIAVEWESNGQPENNYkTTPPVLDSDGSFFLYSKLTVDkSRWQQGNVFSCSVMHEALHNHYTQK                       | K32 and K54                                                  | HC-K395 and HC-K412 or HC-K417                               | 10921.03        | 36%         | 40.5 | 31%         | 40.6 | 45%         | 40.6 | 42%         | 40.5 | 35%         | 40.5 |
| THTCPPCPAPELLGGPSVFLFPPkPKDTLMISRTPEVTCVVDVSHEDPEVkFNWYVDGVEVHNAK                                     | K24 or K26 and K52                                           | HC-K249 or HC-K251 and HC-K277                               | 9180.32         | 34%         | 41.9 | 34%         | 42.0 | 29%         | 42.0 | 31%         | 41.8 | 26%         | 41.8 |



**Table S6.** List of single payload-containing peptides identified with ProSight PD for UVPD replicates in secondary sample. For each peptide, the residue to which the payload was localized, the theoretical mass, as well as the sequence coverage and retention time for each replicate are listed. Some replicate entries are blank in the case that a peptide was not identified in all five technical replicates.

| Annotated Sequence                                                                                                                                      | Payload Localization<br>(residue number<br>on peptide<br>sequence) | Payload Localization<br>(residue number<br>on protein<br>sequence) | Theo. Mass<br>[Da] | Replicate 12 |      | Replicate 3 |      | Replicate 4 |      | Replicate 5 |      |      |      |
|---------------------------------------------------------------------------------------------------------------------------------------------------------|--------------------------------------------------------------------|--------------------------------------------------------------------|--------------------|--------------|------|-------------|------|-------------|------|-------------|------|------|------|
|                                                                                                                                                         |                                                                    |                                                                    |                    | SC           | RT   | SC          | RT   | SC          | RT   | SC          | RT   |      |      |
| ADYEKHK                                                                                                                                                 | K5                                                                 | LC-K188                                                            | 1845.79            | 83%          | 25.6 | 67%         | 25.5 | 83%         | 25.8 | 100%        | 25.8 | 100% | 26.1 |
| ADYEKHKVYACEVTHQGLSSPVTK                                                                                                                                | K5                                                                 | LC-K188                                                            | 3645.68            | 83%          | 25.0 | 70%         | 24.9 | 87%         | 25.1 | 83%         | 24.9 | 87%  | 25.2 |
| ADYEKHKVYACEVTHQGLSSPVTKSFNRGEC                                                                                                                         | K5                                                                 | LC-K188                                                            | 4439.00            | 83%          | 24.7 | 83%         | 24.8 | 80%         | 24.9 | 80%         | 24.8 | 80%  | 25.2 |
| AKGQPREPQVYTLPPSREEMTK                                                                                                                                  | K2                                                                 | HC-K343                                                            | 3497.66            | 67%          | 25.6 | 67%         | 25.5 | 71%         | 25.7 | 57%         | 25.8 | 76%  | 26.1 |
| AKGQPREPQVYTLPPSREEMTKNQVSLTCLVKGFYPSDIAVEWESNGQPENNYKTTPPVLDSDGSFFLYSKLTVDKSRWQQGNVFSCSVMEALHNHYTQK                                                    | K32                                                                | HC-K373                                                            | 12487.96           | 36%          | 31.4 | 22%         | 29.8 | 24%         | 31.3 | 39%         | 31.4 | 30%  | 31.6 |
| AKGQPREPQVYTLPPSREEMTKNQVSLTCLVKGFYPSDIAVEWESNGQPENNYKTTPPVLDSDGSFFLYSKLTVDKSRWQQGNVFSCSVMEALHNHYTQK                                                    | K54                                                                | HC-K395                                                            | 12487.96           | 39%          | 31.3 | 43%         | 31.1 | 55%         | 31.3 | 48%         | 31.3 | 40%  | 31.6 |
| AKGQPREPQVYTLPPSREEMTKNQVSLTCLVKGFYPSDIAVEWESNGQPENNYKTTPPVLDSDGSFFLYSKLTVDKSRWQQGNVFSCSVMEALHNHYTQK                                                    | K54, K71 or K76                                                    | HC-K395, HC-K412, or HC-K417                                       | 12487.96           | 47%          | 32.5 | 41%         | 32.4 | 34%         | 32.4 | 41%         | 32.5 | 42%  | 32.7 |
| AKGQPREPQVYTLPPSREEMTKNQVSLTCLVKGFYPSDIAVEWESNGQPENNYKTTPPVLDSDGSFFLYSKLTVDKSRWQQGNVFSCSVMEALHNHYTQKSLSLSPG                                             | K71 or K76                                                         | HC-K412 or HC-K417                                                 | 13129.29           | 35%          | 32.9 | 36%         | 32.7 | 36%         | 32.9 | 35%         | 33.0 | 38%  | 33.1 |
| DIQMTQSPSSLSASVGDRVTITCRASQDVNTAVAWYQQKPGKAPKLLIYSASFLYSGVPSRFSGSRSGTDFTLTISSLQPEDFATYYCQQHYTTPPTFGQGTKVEIKRTVAAPSVFIFPPSDEQLK                          | K103 or K107                                                       | LC-K103 or LC-K107                                                 | 14728.24           | 15%          | 33.0 | 17%         | 32.8 | 17%         | 32.9 |             |      | 18%  | 33.2 |
| DIQMTQSPSSLSASVGDRVTITCRASQDVNTAVAWYQQKPGKAPKLLIYSASFLYSGVPSRFSGSRSGTDFTLTISSLQPEDFATYYCQQHYTTPPTFGQGTKVEIKRTVAAPSVFIFPPSDEQLK                          | K39, K42, or K45                                                   | LC-K39, LC-K42, or LC-K45                                          | 14728.24           | 22%          | 34.1 | 24%         | 34.1 | 19%         | 33.8 | 20%         | 33.8 | 22%  | 34.2 |
| DTLMISRTPEVTCVVVDVSHEDPEVKFNWYVDGVEVHNAK                                                                                                                | K26                                                                | HC-K277                                                            | 5512.56            | 74%          | 35.4 | 56%         | 35.3 | 54%         | 35.5 | 59%         | 35.5 | 62%  | 35.5 |
| DYFPEPVTVSWNSGALTSGVHTFPAVLQSSGLYSLSSVTVPSSSLGTQTYICNVNHKPSNTK                                                                                          | K58                                                                | HC-K208                                                            | 7611.65            | 21%          | 36.3 | 21%         | 35.7 |             |      |             |      | 19%  | 35.9 |
| EVQLVESGGGLVQPGGSLRLSCAASGFNIKDTYIHWVRQAPGKGLEWVARIYPTNGYTRYADSVKGRFTISADTSKNTAYLQMNSLRAEDTAVYYCSRWGGDGFYAMDYWGQGT LVTVSSASTKGPSVFPLAPSSK               | K65 or K76                                                         | HC-K65 or HC-K76                                                   | 15667.61           | 21%          | 34.8 | 14%         | 34.6 |             |      | 24%         | 34.8 | 22%  | 34.9 |
| EVQLVESGGGLVQPGGSLRLSCAASGFNIKDTYIHWVRQAPGKGLEWVARIYPTNGYTRYADSVKGRFTISADTSKNTAYLQMNSLRAEDTAVYYCSRWGGDGFYAMDYWGQGT LVTVSSASTKGPSVFPLAPSSKSTSGGTAALGCLVK | K65 or K76                                                         | HC-K65 or HC-K76                                                   | 16913.25           | 22%          | 34.7 |             |      | 19%         | 34.7 | 24%         | 34.7 | 19%  | 34.8 |
| EVQLVESGGGLVQPGGSLRLSCAASGFNIKDTYIHWVRQAPGKGLEWVARIYPTNGYTRYADSVK                                                                                       | K30 or K43                                                         | HC-K30 or HC-K43                                                   | 8020.98            | 16%          | 32.7 | 20%         | 34.4 | 25%         | 34.5 |             |      |      |      |
| EVQLVESGGGLVQPGGSLRLSCAASGFNIKDTYIHWVRQAPGK                                                                                                             | K30                                                                | HC-K30                                                             | 5480.70            | 60%          | 34.0 | 52%         | 34.1 | 52%         | 34.3 | 50%         | 34.1 | 55%  | 34.2 |
| GFYPSDIAVEWESNGQPENNYKTTPPVLDSDGSFFLYSKLTVDKSRWQQGNVFSCSVMEALHNHYTQK                                                                                    | K39 or K44                                                         | HC-K412 or HC-K417                                                 | 8879.08            | 43%          | 34.2 |             |      | 27%         | 34.3 | 47%         | 34.2 | 27%  | 34.4 |

|                                                                                                         |                                |                                             |          |     |      |     |      |     |      |     |      |     |      |
|---------------------------------------------------------------------------------------------------------|--------------------------------|---------------------------------------------|----------|-----|------|-----|------|-----|------|-----|------|-----|------|
| GLEWVARIYPTNGYTRYADSVKGRFTISADTSKNTAYLQMNSLRAEDTAVYYCSRWG<br>GDGFYAMDYWGQGLTVTVSSASTKGPSVFPLAPSSK       | K22                            | HC-K65                                      | 11161.28 | 37% | 36.2 | 42% | 36.0 | 24% | 36.2 | 37% | 36.1 | 40% | 36.2 |
| GLEWVARIYPTNGYTRYADSVKGRFTISADTSKNTAYLQMNSLRAEDTAVYYCSRWG<br>GDGFYAMDYWGQGLTVTVSSASTKGPSVFPLAPSSK       | K33                            | HC-K76                                      | 11161.28 | 37% | 36.2 | 42% | 36.0 | 35% | 36.2 | 36% | 36.1 | 39% | 36.2 |
| GQPREPQVYTLPPSREEMTKNQVSLTCLVKGFYPSDIAVEWESNGQPENNYKTTTPVL<br>DSDGSFFLYSKLTVDKSRWQQGNVFCSCVMHEALHNHYTQK | K52                            | HC-395                                      | 12288.82 | 40% | 32.3 | 29% | 32.9 | 35% | 32.2 | 34% | 32.2 | 35% | 32.4 |
| GQPREPQVYTLPPSREEMTKNQVSLTCLVKGFYPSDIAVEWESNGQPENNYKTTTPVL<br>DSDGSFFLYSKLTVDKSRWQQGNVFCSCVMHEALHNHYTQK | K69 or K74                     | HC-K412 or HC-<br>K417                      | 12288.82 | 36% | 33.1 | 29% | 32.9 | 31% | 33.2 | 22% | 33.3 | 31% | 33.3 |
| GRFTISADTSKNTAYLQMNSLRAEDTAVYYCSRWG<br>GDGFYAMDYWGQGLTVTVSSASTKGPSVFPLAPSSK                             | K11                            | HC-K76                                      | 8621.00  | 56% | 37.3 | 54% | 37.0 | 50% | 37.3 | 53% | 37.4 | 56% | 37.3 |
| GRFTISADTSKNTAYLQMNSLRAEDTAVYYCSRWG<br>GDGFYAMDYWGQGLTVTVSSASTKGPSVFPLAPSSK<br>STSGGTAALGCLVK           | K59 or K71                     | HC-K124 or HC-<br>K136                      | 9866.64  | 14% | 36.8 | 38% | 36.8 | 14% | 36.8 |     |      | 18% | 36.9 |
| HKVYACEVTHQGLSSPVTK                                                                                     | K2                             | LC-K190                                     | 3039.42  | 67% | 25.6 | 56% | 25.7 | 67% | 25.9 | 78% | 25.9 | 61% | 26.2 |
| LTVDKSRWQQGNVFCSCVMHEALHNHYTQK                                                                          | K5                             | HC-K417                                     | 4499.06  | 93% | 28.2 | 97% | 27.8 | 97% | 28.2 | 93% | 28.2 | 86% | 28.8 |
| NTAYLQMNSLRAEDTAVYYCSRWG<br>GDGFYAMDYWGQGLTVTVSSASTKGPSVFPLA<br>PSSK                                    | K48                            | HC-K124                                     | 7457.41  | 32% | 39.3 | 39% | 38.8 | 44% | 38.9 | 34% | 39.0 | 42% | 38.9 |
| NTAYLQMNSLRAEDTAVYYCSRWG<br>GDGFYAMDYWGQGLTVTVSSASTKGPSVFPLA<br>PSSK<br>STSGGTAALGCLVK                  | K60                            | HC-K136                                     | 8703.05  | 27% | 38.2 | 27% | 38.1 | 36% | 38.1 | 36% | 38.1 | 38% | 38.1 |
| SCDKTHTCPPCPAPELLGGPSVFLFPPKPK                                                                          | K4                             | HC-K225                                     | 4118.93  | 69% | 34.5 | 69% | 34.0 | 69% | 34.1 | 66% | 33.9 | 66% | 34.0 |
| SGTASVCLLNNFYPREAKVQWKVDNALQSGNSQESVTEQDSKSTYLSSTLTLSKA<br>DYEKHKVYACEVTHQGLSSPVTKSFNRGEC               | K57, K62, or K64               | LC-K183, LC-K188,<br>or LC-K19              | 10631.02 | 26% | 27.7 | 28% | 27.6 | 40% | 27.9 | 32% | 28.1 | 30% | 28.3 |
| THTCPPCPAPELLGGPSVFLFPPKPKDTLMISRTPEVTCVVDVSHEDPEVKFNWYVDG<br>VEVHNAK                                   | K24, or K26                    | HC-K249 or HC-<br>K251                      | 8223.96  | 34% | 35.3 | 35% | 35.1 | 29% | 35.1 | 28% | 35.1 | 25% | 35.4 |
| THTCPPCPAPELLGGPSVFLFPPKPKDTLMISRTPEVTCVVDVSHEDPEVKFNWYVDG<br>VEVHNAK                                   | K52                            | HC-K277                                     | 8223.96  | 26% | 35.3 | 26% | 35.0 | 17% | 35.2 | 45% | 35.0 | 37% | 35.2 |
| THTCPPCPAPELLGGPSVFLFPPKPKDTLMISRTPEVTCVVDVSHEDPEVK                                                     | K26                            | HC-K251                                     | 6565.18  | 35% | 35.4 | 45% | 35.0 | 41% | 35.1 | 53% | 35.1 | 45% | 35.2 |
| THTCPPCPAPELLGGPSVFLFPPKPK                                                                              | K24                            | HC-K249                                     | 3685.77  | 72% | 37.7 | 60% | 37.7 | 72% | 37.7 | 60% | 37.9 | 72% | 37.8 |
| VSNKALPAIEK                                                                                             | K4                             | HC-K329                                     | 2222.10  | 82% | 29.4 | 82% | 29.3 | 82% | 29.6 | 64% | 29.6 | 73% | 30.0 |
| VYACEVTHQGLSSPVTKSFNRGEC                                                                                | K17                            | LC-K207                                     | 3567.58  | 44% | 29.5 | 48% | 29.4 | 39% | 29.6 | 35% | 29.7 | 39% | 30.0 |
| TKPREEQYNSTYRVVSVLTVLHQDWLNGK                                                                           | K2 and G0F N-<br>Glycan        | HC-K293 and G0F<br>N-Glycan                 | 5860.69  | 54% | 31.8 | 61% | 30.6 | 54% | 31.1 | 54% | 31.8 | 50% | 31.9 |
| TKPREEQYNSTYRVVSVLTVLHQDWLNGK                                                                           | K2 and G1F N-<br>Glycan        | HC-K293 and G1F<br>N-Glycan                 | 6022.74  | 50% | 30.9 | 64% | 30.7 | 57% | 31.0 | 54% | 31.0 | 54% | 31.9 |
| DTLMISRTPEVTCVVDVSHEDPEVKFNWYVDGVEVHNAKTKPREEQYNSTYRVVSV<br>LTVLHQDWLNGK                                | K40 or K42 and<br>G0F N-Glycan | HC-K291 or HC-<br>K293 and G0F N-<br>Glycan | 10398.88 |     |      | 28% | 31.8 | 31% | 31.6 | 34% | 31.6 | 32% | 31.7 |
| FNWYVDGVEVHNAKTKPREEQYNSTYRVVSVLTVLHQDWLNGK                                                             | K14 or K16 and<br>G0F N-Glycan | HC-K291 or HC-<br>K293 and G0F N-<br>Glycan | 7519.47  | 67% | 31.1 |     |      | 45% | 31.2 | 52% | 31.2 | 48% | 31.4 |
| FNWYVDGVEVHNAKTKPREEQYNSTYRVVSVLTVLHQDWLNGK                                                             | K14 or K16 and<br>G1F N-Glycan | HC-K291 or HC-<br>K293 and G1F N-<br>Glycan | 7681.52  | 38% | 31.0 | 41% | 30.8 | 31% | 31.1 | 50% | 31.2 | 41% | 31.3 |

**Table S7.** List of single payload-containing peptides identified with ProSight PD for EThcD replicates in secondary sample. For each peptide, the residue to which the payload was localized, the theoretical mass, as well as the sequence coverage and retention time for each replicate are listed. Some replicate entries are blank in the case that a peptide was not identified in all five technical replicates.

| Annotated Sequence                                                                                                                     | Payload Localization<br>(residue number<br>on peptide<br>sequence) | Payload Localization<br>(residue number<br>on protein<br>sequence) | Theo. Mass<br>[Da] | Replicate 12 |      | Replicate 3 |      | Replicate 4 |      | Replicate 5 |      |
|----------------------------------------------------------------------------------------------------------------------------------------|--------------------------------------------------------------------|--------------------------------------------------------------------|--------------------|--------------|------|-------------|------|-------------|------|-------------|------|
|                                                                                                                                        |                                                                    |                                                                    |                    | SC           | RT   | SC          | RT   | SC          | RT   | SC          | RT   |
| ADYEKHK                                                                                                                                | K5                                                                 | LC-K188                                                            | 1845.79            | 100 %        | 25.9 | 83%         | 26.0 | 100 %       | 26.6 | 100 %       | 26.0 |
| ADYEKHKVYACEVTHQGLSSPVTK                                                                                                               | K5                                                                 | LC-K188                                                            | 3645.68            | 74%          | 24.9 | 87%         | 25.1 | 83%         | 25.1 | 96%         | 25.2 |
| ADYEKHKVYACEVTHQGLSSPVTK                                                                                                               | K7                                                                 | LC-K190                                                            | 3645.68            | 30%          | 25.0 | 35%         | 25.8 |             |      | 83%         | 25.7 |
| ADYEKHKVYACEVTHQGLSSPVTKSFNRGEC                                                                                                        | K5                                                                 | LC-K188                                                            | 4439.00            | 80%          | 24.7 | 80%         | 25.1 | 77%         | 24.8 | 77%         | 25.0 |
| ADYEKHKVYACEVTHQGLSSPVTKSFNRGEC                                                                                                        | K7                                                                 | LC-K190                                                            | 4439.00            | 57%          | 24.7 | 57%         | 25.6 | 73%         | 25.7 | 63%         | 25.6 |
| AKGQPREPQVYTLPPSREEMTK                                                                                                                 | K2                                                                 | HC-K343                                                            | 3497.66            | 67%          | 25.8 | 48%         | 26.4 | 62%         | 26.1 | 67%         | 26.4 |
| AKGQPREPQVYTLPPSREEMTKNQVSLTCLVKGFYPSDIAVEWESNGQPENNYKTTPP<br>VLDSDGSFFLYSKLTVDKSRWQQGNVFCFSVMHEALHNHYTQK                              | K2                                                                 | HC-K343                                                            | 12487.96           | 25%          | 30.2 | 8%          | 30.4 |             |      | 17%         | 30.2 |
| AKGQPREPQVYTLPPSREEMTKNQVSLTCLVKGFYPSDIAVEWESNGQPENNYKTTPP<br>VLDSDGSFFLYSKLTVDKSRWQQGNVFCFSVMHEALHNHYTQK                              | K54                                                                | HC-K395                                                            | 12487.96           | 46%          | 31.4 | 40%         | 31.6 | 40%         | 31.5 | 39%         | 31.7 |
| AKGQPREPQVYTLPPSREEMTKNQVSLTCLVKGFYPSDIAVEWESNGQPENNYKTTPP<br>VLDSDGSFFLYSKLTVDKSRWQQGNVFCFSVMHEALHNHYTQK                              | K71 or K76                                                         | HC-K412 or HC-K417                                                 | 12487.96           | 46%          | 32.5 | 47%         | 32.7 | 50%         | 32.6 | 47%         | 32.8 |
| AKGQPREPQVYTLPPSREEMTKNQVSLTCLVKGFYPSDIAVEWESNGQPENNYKTTPP<br>VLDSDGSFFLYSKLTVDKSRWQQGNVFCFSVMHEALHNHYTQKSLSLSPG                       | K54                                                                | HC-K395                                                            | 13129.29           | 37%          | 31.6 | 38%         | 31.7 |             |      | 47%         | 31.7 |
| AKGQPREPQVYTLPPSREEMTKNQVSLTCLVKGFYPSDIAVEWESNGQPENNYKTTPP<br>VLDSDGSFFLYSKLTVDKSRWQQGNVFCFSVMHEALHNHYTQKSLSLSPG                       | K71 or K76                                                         | HC-K412 or HC-K417                                                 | 13129.29           | 40%          | 33.0 | 44%         | 33.1 | 36%         | 33.1 | 41%         | 33.1 |
| ALPAPIEKTISK                                                                                                                           | K8                                                                 | HC-K337                                                            | 2223.12            | 73%          | 31.6 | 73%         | 31.8 | 55%         | 31.6 | 73%         | 31.8 |
| DIQMTQSPSSLSASVGDRVTITCRASQDVNTAVAWYQQKPGKAPKLLIYSASFLYSGVP<br>SRFSGSRSGTDFTLTISSLQPEDFATYYCQQHYTTPPTFGQGTKVEIKRTVAAPSVFIFPPS<br>DEQLK | K38, K42, or K45                                                   | LC-K39, LC-K42, or LC-K45                                          | 14728.24           | 26%          | 33.8 | 22%         | 33.8 | 29%         | 33.8 | 26%         | 34.0 |
| DIQMTQSPSSLSASVGDRVTITCRASQDVNTAVAWYQQKPGKAPKLLIYSASFLYSGVP<br>SRFSGSRSGTDFTLTISSLQPEDFATYYCQQHYTTPPTFGQGTKVEIKRTVAAPSVFIFPPS<br>DEQLK | K103 or K107                                                       | LC-K103 or LC-K107                                                 | 14728.24           | 16%          | 33.1 | 16%         | 33.0 | 20%         | 33.0 | 18%         | 33.3 |
| DSTYLSSTLTLSKADYEKHKVYACEVTHQGLSSPVTKSFNRGEC                                                                                           | K19 or K21                                                         | LC-K188 or LC-K190                                                 | 5922.74            | 43%          | 27.9 | 18%         | 28.1 | 66%         | 27.7 | 30%         | 28.2 |
| DTLMISRTPEVTCVVVDVSHEDPEVKFNWYVDGVEVHNAK                                                                                               | K26                                                                | HC-K277                                                            | 5512.56            | 54%          | 35.5 | 54%         | 35.5 | 39%         | 35.4 | 54%         | 35.6 |
| DTYIHWVRQAPGKGLEWVARIYPTNGYTRYADSVK                                                                                                    | K13                                                                | HC-K43                                                             | 5066.45            |              |      | 62%         | 31.3 | 56%         | 31.3 | 59%         | 31.4 |
| DYFPEPVTVSWNSGALTSGVHTFPAVLQSSGLYSLSSVTVTPSSSLGTQTYICNVNHKPS<br>NTK                                                                    | K58                                                                | HC-K208                                                            | 7611.65            | 37%          | 35.8 | 29%         | 35.9 | 18%         | 35.9 | 23%         | 36.0 |
| EVQLVESGGGLVQPGGSLRLSCAASGFNIKDTYIHWVRQAPGK                                                                                            | K30                                                                | HC-K30                                                             | 5480.70            | 67%          | 34.1 | 64%         | 34.2 | 67%         | 34.2 | 62%         | 34.3 |
| EVQLVESGGGLVQPGGSLRLSCAASGFNIKDTYIHWVRQAPGKGLEWVARIYPTNGYT<br>RYADSVK                                                                  | K30                                                                | HC-K30                                                             | 8020.98            | 31%          | 34.4 | 23%         | 34.5 | 44%         | 34.5 | 50%         | 34.6 |

|                                                                                                                                                   |                          |                             |          |     |      |          |      |     |      |     |      |     |      |
|---------------------------------------------------------------------------------------------------------------------------------------------------|--------------------------|-----------------------------|----------|-----|------|----------|------|-----|------|-----|------|-----|------|
| EVQLVESGGGLVQPGGSLRLSCAASGFNIKDTYIHWVRQAPGKGLEWVARIYPTNGYT<br>RYADSVKGRFTISADTSKNTAYLQMNSLRAEDTAVYYCSRWGGDGFYAMDYWGQGT<br>LTVTVSSASTKGPSVFPLAPSSK | K65 or K76               | HC-K65 or HC-K76            | 15667.61 | 22% | 34.8 | 23%      | 34.8 | 13% | 34.9 | 16% | 35.0 | 23% | 34.9 |
| GFYPSDIAVEWESNGQPENNYKTPPVLDSDGSFFLYSKLTVDKSRWQQGNVFSCSV<br>MHEALHNHYTQK                                                                          | K44                      | HC-K417                     | 8879.08  | 59% | 34.2 | 52%      | 34.3 | 44% | 34.3 | 44% | 34.4 | 46% | 34.3 |
| GLEWVARIYPTNGYTRYADSVKGRFTISADTSKNTAYLQMNSLRAEDTAVYYCSRW<br>GDGFYAMDYWGQGT LTVTVSSASTKGPSVFPLAPSSK                                                | K22                      | HC-K65                      | 11161.28 | 26% | 36.1 | 47%      | 36.1 | 55% | 36.2 | 45% | 36.3 | 44% | 36.2 |
| GLEWVARIYPTNGYTRYADSVKGRFTISADTSKNTAYLQMNSLRAEDTAVYYCSRW<br>GDGFYAMDYWGQGT LTVTVSSASTKGPSVFPLAPSSK                                                | K33                      | HC-K76                      | 11161.28 | 26% | 36.1 | 47%      | 36.1 | 41% | 36.1 |     |      | 44% | 36.2 |
| GQPREPQVYTLPPSREEMTKNQVSLTCLVKGFYPSDIAVEWESNGQPENNYKTPPV<br>LSDGSFFLYSKLTVDKSRWQQGNVFSCSV MHEALHNHYTQK                                            | K52                      | HC-395                      | 12288.82 | 36% | 32.2 | 42%      | 32.5 | 32% | 32.4 | 38% | 32.6 | 34% | 32.4 |
| GQPREPQVYTLPPSREEMTKNQVSLTCLVKGFYPSDIAVEWESNGQPENNYKTPPV<br>LSDGSFFLYSKLTVDKSRWQQGNVFSCSV MHEALHNHYTQK                                            | K69 or K74               | HC-K412 or HC-<br>K417      | 12288.82 | 35% | 33.2 | 21%      | 33.4 | 36% | 33.2 | 33% | 33.5 | 17% | 33.6 |
| GRFTISADTSKNTAYLQMNSLRAEDTAVYYCSRWGGDGFYAMDYWGQGT LTVTVSSA<br>TKGPSVFPLAPSSK                                                                      | K11                      | HC-K76                      | 8621.00  | 87% | 37.3 | 80%      | 37.3 | 74% | 37.3 | 69% | 37.7 | 87% | 37.2 |
| HKVYACEVTHQGLSPVTK                                                                                                                                | K2                       | LC-K190                     | 3039.42  | 83% | 25.9 | 78%      | 26.2 | 83% | 26.2 | 83% | 26.2 | 89% | 26.2 |
| LTVDKSRWQQGNVFSCSV MHEALHNHYTQK                                                                                                                   | K5                       | HC-K417                     | 4499.06  | 90% | 28.3 | 93%      | 28.7 | 90% | 28.7 | 90% | 28.6 | 97% | 28.6 |
| NTAYLQMNSLRAEDTAVYYCSRWGGDGFYAMDYWGQGT LTVTVSSASTKGPSVFPLA<br>PSSK                                                                                | K48                      | HC-K124                     | 7457.41  | 63% | 38.9 | 44%      | 38.9 | 49% | 38.8 | 56% | 38.9 | 51% | 38.8 |
| NTAYLQMNSLRAEDTAVYYCSRWGGDGFYAMDYWGQGT LTVTVSSASTKGPSVFPLA<br>PSSKSTSGGTAALGCLVK                                                                  | K60                      | HC-K136                     | 8703.05  | 22% | 38.1 | 23%      | 38.1 | 21% | 38.0 | 19% | 38.2 | 19% | 38.1 |
| SCDKTHTCPPCPAPELLGGPSVFLFPPKPK                                                                                                                    | K4                       | HC-K225                     | 4118.93  | 86% | 33.9 | 83%      | 33.9 | 83% | 34.0 | 76% | 34.0 | 76% | 34.1 |
| SGTASVVCLLNNFYPREAKVQWKVDNALQSGNSQESVTEQDSKSTYLSSTLTLSKA<br>DYEKHKVYACEVTHQGLSPVTKSFNRGEC                                                         | K62                      | LC-K188                     | 10631.02 | 31% | 28.1 | 22%      | 28.4 | 26% | 28.4 | 22% | 28.4 | 36% | 28.4 |
| THTCPPCPAPELLGGPSVFLFPPKPK                                                                                                                        | K24                      | HC-K249                     | 3685.77  | 68% | 37.7 | 88%      | 37.8 | 68% | 37.6 | 68% | 37.8 | 68% | 37.7 |
| THTCPPCPAPELLGGPSVFLFPPKPKDTLMISRTPEVTCVVDVSHEDPEVK                                                                                               | K24 or K26               | HC-K249 or HC-<br>K251      | 6565.18  | 53% | 35.1 | 31%      | 35.5 | 49% | 35.1 | 37% | 35.3 | 33% | 35.2 |
| THTCPPCPAPELLGGPSVFLFPPKPKDTLMISRTPEVTCVVDVSHEDPEVKFNWYVDG<br>VEVHNAK                                                                             | K26                      | HC-K251                     | 8223.96  | 31% | 35.2 | 31%      | 35.4 | 15% | 35.4 | 22% | 35.4 | 31% | 35.4 |
| THTCPPCPAPELLGGPSVFLFPPKPKDTLMISRTPEVTCVVDVSHEDPEVKFNWYVDG<br>VEVHNAK                                                                             | K52                      | HC-K277                     | 8223.96  | 45% | 35.1 | 32%      | 35.3 | 40% | 35.2 | 40% | 35.3 | 32% | 35.4 |
| VSNKALPAPIEK                                                                                                                                      | K4                       | HC-K329                     | 2222.10  | 91% | 29.8 | 100<br>% | 29.9 | 73% | 29.9 | 91% | 30.0 | 82% | 29.9 |
| VYACEVTHQGLSPVTKSFNRGEC                                                                                                                           | K17                      | LC-K207                     | 3567.58  |     |      |          |      | 35% | 30.0 | 35% | 30.0 | 26% | 30.1 |
| TKPREEQYNSTYRVVSVLTVLHQDWLNGK                                                                                                                     | K2 and G0F N-<br>Glycan  | HC-K293 and G0F<br>N-Glycan | 5860.69  | 79% | 31.2 | 68%      | 31.9 | 75% | 31.4 | 79% | 31.4 | 61% | 31.4 |
| TKPREEQYNSTYRVVSVLTVLHQDWLNGK                                                                                                                     | K2 and G1F N-<br>Glycan  | HC-K293 and G1F<br>N-Glycan | 6022.74  | 86% | 31.1 | 79%      | 31.3 | 75% | 31.3 | 82% | 31.4 | 71% | 31.3 |
| DTLMISRTPEVTCVVDVSHEDPEVKFNWYVDGVEVHNAKTKPREEQYNSTYRVVSV<br>LTVLHQDWLNGK                                                                          | K40 and G0F N-<br>Glycan | HC-K291 and G0F<br>N-Glycan | 10398.88 | 29% | 31.6 | 47%      | 31.8 | 52% | 31.7 | 41% | 31.8 | 22% | 31.7 |
| FNWYVDGVEVHNAKTKPREEQYNSTYRVVSVLTVLHQDWLNGK                                                                                                       | K14 and G0F N-<br>Glycan | HC-K291 and G0F<br>N-Glycan | 7519.47  | 86% | 31.3 | 64%      | 31.5 | 74% | 31.4 | 79% | 31.5 | 55% | 31.5 |
| FNWYVDGVEVHNAKTKPREEQYNSTYRVVSVLTVLHQDWLNGK                                                                                                       | K14 and G1F N-<br>Glycan | HC-K291 and G1F<br>N-Glycan | 7681.52  | 71% | 31.3 | 71%      | 31.4 | 81% | 31.3 | 81% | 31.4 | 48% | 31.4 |

**Table S8.** List of two payload-containing peptides identified with ProSight PD for UVPD replicates in secondary sample. For each peptide, the residue to which the payload was localized, the theoretical mass, as well as the sequence coverage and retention time for each replicate are listed. Some replicate entries are blank in the case that a peptide was not identified in all five technical replicates.

| Annotated Sequence                                                                                    | Payload Localization<br>(residue number on peptide sequence) | Payload Localization<br>(residue number on protein sequence) | Theo. Mass [Da] | Replicate 1 |      | Replicate 2 |      | Replicate 3 |      | Replicate 4 |      | Replicate 5 |      |
|-------------------------------------------------------------------------------------------------------|--------------------------------------------------------------|--------------------------------------------------------------|-----------------|-------------|------|-------------|------|-------------|------|-------------|------|-------------|------|
|                                                                                                       |                                                              |                                                              |                 | SC          | RT   |
| AKGQPREPQVYTLPPSREEMTKNQVSLTCLVKGFYPSDIAVEWESNGQPENNYkTTPPVLDSDGSFFLYskLTVDKSRWQQGNVFSCSVMHEALHNHYTQK | K54 and K71 or K76                                           | HC-K395 and HC-K412 or HC-K417                               | 13444.32        | 29%         | 38.5 | 35%         | 38.3 | 34%         | 38.3 | 45%         | 38.2 | 36%         | 38.3 |
| GFYPSDIAVEWESNGQPENNYkTTPPVLDSDGSFFLYskLTVDKSRWQQGNVFSCSVMHEALHNHYTQK                                 | K22 and K39 or K44                                           | HC-K395 and HC-K412 or HC-K417                               | 9835.44         | 37%         | 40.6 | 41%         | 40.5 | 34%         | 40.6 | 18%         | 40.5 | 21%         | 40.5 |
| GQPREPQVYTLPPSREEMTKNQVSLTCLVKGFYPSDIAVEWESNGQPENNYkTTPPVLDSDGSFFLYskLTVDKSRWQQGNVFSCSVMHEALHNHYTQK   | K52 and K69 or K74                                           | HC-K395 and HC-K412 or HC-K417                               | 13245.19        | 19%         | 38.9 |             |      | 25%         | 38.8 |             |      | 30%         | 38.8 |
| NQVSLTCLVKGFYPSDIAVEWESNGQPENNYkTTPPVLDSDGSFFLYskLTVDKSRWQQGNVFSCSVMHEALHNHYTQK                       | K32 and K49 or K54                                           | HC-K395 and HC-K412 or HC-K417                               | 10921.03        | 30%         | 40.6 | 23%         | 40.7 | 31%         | 40.7 | 40%         | 40.5 | 23%         | 40.5 |
| THTCPPCPAPELLGGPSVFLFPPkPKDTLMISRTPEVTCVVVDVSHEDPEVKFNWYVDGVEVHNAK                                    | K24 or K26 and K52                                           | HC-K249 or HC-K251 and HC-K277                               | 9180.32         |             |      | 22%         | 42.0 | #N/A        | #N/A | 26%         | 42.0 | 25%         | 42.1 |

**Table S9.** List of two payload-containing peptides identified with ProSight PD for EThcD replicates in secondary sample. For each peptide, the residue to which the payload was localized, the theoretical mass, as well as the sequence coverage and retention time for each replicate are listed. Some replicate entries are blank in the case that a peptide was not identified in all five technical replicates.

| Annotated Sequence                                                                                  | Payload Localization<br>(residue number on peptide sequence) | Payload Localization<br>(residue number on protein sequence) | Theo. Mass [Da] | Replicate 1 |      | Replicate 2 |      | Replicate 3 |      | Replicate 4 |      | Replicate 5 |      |
|-----------------------------------------------------------------------------------------------------|--------------------------------------------------------------|--------------------------------------------------------------|-----------------|-------------|------|-------------|------|-------------|------|-------------|------|-------------|------|
|                                                                                                     |                                                              |                                                              |                 | SC          | RT   |
| AKGQPREPQVYTLPPSREEMTKNQVSLTCLVKGFYPSDIAVEWESNGQPENNYkTTPPVLDSDGSFFLYskLTVDKSRWQQGNVFSVMHEALHNHYTQK | K54 and K71 or K76                                           | HC-K395 and HC-K412 or HC-K417                               | 13444.32        | 33%         | 38.4 | 40%         | 38.0 | 37%         | 38.2 | 38%         | 38.4 | 38%         | 38.3 |
| EVQLVESGGGLVQPGGSLRLSCAASGFNIKDTYIHWVRQAPGkGLEWVARIYPTNGYT RYADSVK                                  | K30 and K43                                                  | HC-K30 and HC-K43                                            | 8977.34         | 23%         | 41.8 | 33%         | 41.7 | 17%         | 41.7 | 25%         | 41.9 | 28%         | 41.8 |
| GFYPSDIAVEWESNGQPENNYkTTPPVLDSDGSFFLYSKLTVDkSRWQQGNVFSVMHEALHNHYTQK                                 | K22 and K44                                                  | HC-K395 and HC-K417                                          | 9835.44         | 46%         | 40.5 | 63%         | 40.8 | 46%         | 40.5 | 49%         | 40.7 | 57%         | 40.5 |
| NQVSLTCLVKGFYPSDIAVEWESNGQPENNYkTTPPVLDSDGSFFLYSKLTVDkSRWQQGNVFSVMHEALHNHYTQK                       | K32 and K49 or K54                                           | HC-K395 and HC-K412 or HC-K417                               | 10921.03        | 33%         | 40.5 | 39%         | 40.5 | 35%         | 40.4 | 32%         | 40.5 | 40%         | 40.4 |
| THTCPPCPAPELLGGPSVFLFPPkPKDTLMISRTPEVTCVVVDVSHEDPEVkfFNWYVDGVEVHNAK                                 | K24 or K26 and K52                                           | HC-K249 or HC-K251 and HC-K277                               | 9180.32         | 20%         | 42.0 | 43%         | 41.8 | 32%         | 41.8 | 39%         | 41.8 | 31%         | 41.8 |

**Table S10.** Number of identified payload-modified peptide spectral matches for two different lots of TDM-1 based on bottom-up analysis of tryptic digests.

| Number of payload-modified peptide spectral matches          |              |              |
|--------------------------------------------------------------|--------------|--------------|
|                                                              | Lot #3535802 | Lot #1153402 |
| <b>HCD only</b>                                              | 21           | 46           |
| <b>HCD-triggered-EThcD</b>                                   | 69*          | 48*          |
| <b>HCD-triggered-UVPD</b>                                    | 75*          | 76*          |
| No score cut-off is used                                     |              |              |
| * Includes peptide spectral matches (PSMs) from HCD as well. |              |              |

**Table S11.** Number of payload-modified lysines identified in heavy and light chains (HC and LC) of two different lots of TDM-1 based on bottom-up analysis of tryptic digests.

| Number of modified Lysines (HC + LC)                         |              |              |
|--------------------------------------------------------------|--------------|--------------|
|                                                              | Lot #3535802 | Lot #1153402 |
| HCD only                                                     | 7 + 0        | 11 + 5       |
| HCD-triggered-ETHcD                                          | 12 + 5 *     | 13 + 3 *     |
| HCD-triggered-UVPD                                           | 14 + 4 *     | 15 + 5*      |
| No score cut-off is used                                     |              |              |
| * Includes peptide spectral matches (PSMs) from HCD as well. |              |              |
